# Supplementary material
Source: PubMed Central journal article supplement (PMC4207535)

# A group of sequence-related sphingomonad enzymes catalyzes cleavage of $\beta$ -aryl ether linkages in lignin $\beta$ -guaiacyl and $\beta$ -syringyl ether dimers

Daniel L. Gall,<sup>1,2\*</sup> John Ralph,<sup>2,3</sup> Timothy J. Donohue,<sup>2,4</sup> and Daniel R. Noguera<sup>1,2,5</sup>

<sup>1</sup>Department of Civil & Environmental Engineering, University of Wisconsin, Madison, WI 53706

<sup>2</sup>U.S. Department of Energy Great Lakes Bioenergy Research Center, Wisconsin Energy Institute, University of Wisconsin, Madison WI 53726

<sup>3</sup>Department of Biochemistry, University of Wisconsin, Madison, WI 53706

<sup>4</sup>Department of Bacteriology, University of Wisconsin, Madison, WI 53706

<sup>5</sup>Environmental Chemistry and Technology Program, University of Wisconsin, Madison WI 53706

\*To whom correspondence should be addressed: Daniel Gall, 5175 Wisconsin Energy Institute, 1552 University Ave., Madison, WI 53726-4084. Phone: 608-265-8465; e-mail address: dlcall@wisc.edu

## SUPPORTING INFORMATION – GENE CLONING

**Preparation of pVP302K.** An 822-bp fragment was amplified from pVP202K using upstream and downstream primers. An upstream 95-bp primer containing (a) a 5'-end (N-terminal) 26-bp region encoding a partial NHis<sub>8</sub> tag (for subsequent cloning into vector pVP102K), (b) an internal 41-bp region containing an in-frame *Tev* protease cleavage site (ENLYFQS), and (c) a 3'-end (C-terminal) 28-bp region (annealing to pVP202K) was obtained commercially. Additionally, a 57-bp downstream primer containing (a) a 5'-end 24-bp region (for subsequent cloning into vector pVP102K) and (b) a 3'-end 33-bp region (annealing to vector pVP202K) was designed. The resulting 822-bp fragment containing the N-terminal NHis<sub>8</sub> tag and *Tev* protease site, as well as the C-terminal *Vibrio cholerae* RtxA protease-CHis<sub>8</sub> fusion was subsequently cloned into pVP102K by PCR overlap extension,<sup>1-4</sup> yielding pVP302K.

**Preparation of the pVP102K-RpHypGST expression plasmid.** A 786-bp fragment encoding the RpHypGST (UniProt ID Q6N1R4\_RHOPA) ORF was amplified from *Rhodopseudomonas palustris* genomic DNA and was cloned into the *Nhe*I and *Age*I restriction sites of pVP102K, yielding pVP102K-RpHypGST. Because the N-terminus of *SsLigE* and *LigE* homologs was inaccessible to *Tev* protease cleavage, pVP102K-RpHypGST was designed for expression of *LigE* with residual N-terminal amino acid translated between the *Tev* cleavage site and the native start codon. The resulting construct allowed for cleavage of the NHis<sub>8</sub> tag by *Tev* protease, affording 28.6 kDa recombinant enzyme RpHypGST (Fig. S1A) with residual N-terminal amino acids after cleavage with *Tev* protease (termed N-RpHypGST hereafter). The yield of N-RpHypGST after expression and protein purification was 19.6 mg L<sub>cells</sub><sup>-1</sup>.

**Preparation of the pVP202K-RpHypGST expression plasmid.** A 728-bp fragment encoding the RpHypGST (UniProt ID Q6N1R4\_RHOPA) ORF was amplified from *R. palustris* genomic DNA and cloned into pVP202K. The plasmid was cut with *Bsp*HI and *Bsa*I restriction enzymes, and vector

pVP202K was cut with NcoI and BsaI. The two resulting fragments were ligated, producing pVP202K-RpHypGST, which was used for the expression of recombinant 25.5 kDa RpHypGST with a residual C-terminal leucine residue (termed C-RpHypGST hereafter). The yield of C-RpHypGST after expression and protein purification was 20.8 mg  $L_{\text{cells}}^{-1}$ .

**Preparation of the pVP202K-NaLigE expression plasmid.** A 904-bp fragment encoding the NaLigE (UniProt ID Q2G5N2\_NOVAD) ORF was amplified from *N. aromaticivorans* DSM12444 genomic DNA and cloned into pVP202K by the PCR overlap method<sup>1-4</sup> to yield pVP202K-NaLigE, which was used for the expression of the 31.1 kDa enzyme NaLigE (Fig. S1B). The yield of NaLigE after expression and protein purification was 40.4 mg  $L_{\text{cells}}^{-1}$ .

**Preparation of the pVP202K-NsLigE expression plasmid.** An 842-bp fragment containing the NsLigE-encoding (UniProt ID F6IKY6\_9SPHN) ORF was amplified from pMK1157550 (obtained from Invitrogen) and cloned into the NcoI and BsaI restriction enzyme sites of pVP202K, producing pVP202K-NsLigE, which was used for the expression of the 30.8 kDa enzyme NsLigE (Fig. S1C). The yield of NsLigE after expression and protein purification was 74.9 mg  $L_{\text{cells}}^{-1}$ .

**Preparation of the pVP202K-SsLigE expression plasmid.** As previously described,<sup>5</sup> the ORF encoding *Sphingobium* sp. strain SYK-6 SsLigE (UniProt ID G2IN93\_9SPHN) was cloned into expression vector pVP202K by the PCR overlap method.<sup>1-4</sup> The first round of PCR yielded a 906-bp amplicon, which was used to prime plasmid pVP202K in the second round of PCR, affording the 5,470-bp plasmid pVP202K-SsLigE, which was used for expression of 32.1 kDa SsLigE (Fig. S1D). The yield of SsLigE after expression and protein purification was 65.0 mg  $L_{\text{cells}}^{-1}$ .

**Preparation of the pVP202K-SsLigP expression plasmid.** As previously described,<sup>5</sup> a 902-bp fragment containing the SsLigP-encoding (UniProt ID E1CJ68\_9SPHN) ORF and was cloned into vector pVP202K by the PCR overlap method,<sup>1-4</sup> affording plasmid pVP202K-SsLigP, which was used for the expression of 31.0 kDa SsLigP (Fig. S1E). The yield of SsLigP after expression and protein purification was 48.8 mg  $L_{\text{cells}}^{-1}$ .

**Preparation of the pVP302K-NaLigF1 expression plasmid.** A 707-bp fragment containing the NaLigF1-encoding (UniProt ID Q2G6J3\_NOVAD) ORF was amplified from *N. aromaticivorans* DSM12444 genomic DNA and cloned into pVP302K by PCR overlap extension,<sup>1-4</sup> yielding pVP302K-NaLigF1, which was used for the expression of the 28.9 kDa enzyme NaLigF1 (Fig. S1F). The yield of NaLigF1 after expression and protein purification was 46.3 mg  $L_{\text{cells}}^{-1}$ .

**Preparation of the pVP202K-NaLigF2 expression plasmid.** An 839-bp fragment encoding the NaLigF2 (UniProt ID Q2G4C2\_NOVAD) ORF was amplified from *N. aromaticivorans* DSM12444 genomic DNA and cloned into pVP202K by PCR overlap<sup>1-4</sup> to produce pVP202K-NaLigF2, which was used for expression of the 29.3 kDa enzyme NaLigF2 (Fig. S1G). The yield of NaLigF2 after expression and protein purification was 70.6 mg  $L_{\text{cells}}^{-1}$ .

**Preparation of the pVP102K-SsLigF expression plasmid.** As previously described,<sup>5</sup> an 822-bp fragment containing the SsLigF-encoding (UniProt ID G2IN92\_9SPHN) ORF was amplified and the amplicon was restricted with AsiSI and SacII. The resulting 809-bp fragment was inserted into the AsiI-SacII region of pVP102K, affording plasmid pVP102K-SsLigF, which was used for the expression of 30.0 kDa SsLigF (Fig. S1H). The yield of SsLigF after expression and protein purification was 50.2 mg  $L_{\text{cells}}^{-1}$ .

# SUPPORTING INFORMATION – SYNTHETIC DETAILS AND NMR DATA

## CHEMICAL SYNTHESSES:

**General.**  $\beta$ -Ether-linked model compounds were synthesized according to the method of Adler and Eriksoo<sup>6, 7</sup>.  $R_f$  values were calculated as the ratio of elution volume to total solvent volume (v/v). Chromatographic elution volumes were calculated as the product of the mobile phase flow rate (in mL  $\text{min}^{-1}$ ) and a given compound's retention time ( $t_R$ , in min).

Chemicals and reagents were purchased from Sigma-Aldrich.  $^1\text{H}$  and  $^{13}\text{C}$  NMR spectra were recorded on a Bruker Biospin (Billerica, MA) AVANCE 700 MHz spectrometer fitted with a cryogenically cooled 5-mm TXI gradient probe with inverse geometry (proton coils closest to the sample). Chemical shifts are reported in parts per million (ppm). The central NMR solvent peaks were used as internal references ( $\delta_{\text{H}}$ : 2.05 ppm and  $\delta_{\text{C}}$ : 29.8 ppm for acetone- $d_6$ ;  $\delta_{\text{H}}$ : 4.79 ppm for (HDO in)  $\text{D}_2\text{O}$ <sup>8, 9</sup>.  $J$  values are recorded in Hz. Carbon and proton assignments for all compounds as labeled in the included  $^1\text{H}$  and  $^{13}\text{C}$  NMR spectra were determined by via the aid of 2D COSY, HSQC, and HMBC NMR spectra. Merck-EMD Millipore aluminum-backed Silica Gel 60 F<sub>254</sub> normal-phase thin-layer chromatography plates were used for small-scale separation of organic compounds using a mixture of hexane and ethyl acetate as the mobile solvent. Biotage KP-Sil silica gel was used for preparative separations of organic compounds by flash chromatography using a CombiFlash  $R_f$  delivery module using a mixture of hexane and ethyl acetate as the mobile phase.

**Synthesis of  $\beta$ -bromo- $\alpha$ -(4-O-methyl)-guaiacylathanone (Fig. S2A-B).** A solution of ethyl acetate (200 mL),  $\alpha$ -(4-O-methyl)-guaiacylathanone (7.24 g, 40.2 mmol), and pyridinium tribromide (13.5 g, 42.2 mmol) was prepared in a 500-mL round-bottom flask with magnetic stirring. After 30 min, the reaction mixture was washed three times with saturated  $\text{Na}_2\text{CO}_3$ , once with  $\text{H}_2\text{O}$ , and once with brine. The organic layer was then dried over  $\text{MgSO}_4$  and the solvent was evaporated *in vacuo*. The resulting residue was then dissolved in hot methanol and allowed to cool, affording crystalline  $\beta$ -bromo- $\alpha$ -(4-O-methyl)-guaiacylathanone (6.1 g, 59% yield).

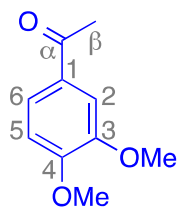

### $\alpha$ -(4-O-methyl)-guaiacylathanone [from Sigma-Aldrich]:

$^1\text{H}$  NMR (700 MHz, acetone- $d_6$ )  $\delta$  7.61 (dd, 1H,  $J$  = 8.4, 2.1 Hz, H6); 7.49 (d, 1H,  $J$  = 2.1 Hz, H2); 7.01 (d, 1H,  $J$  = 8.4 Hz, H5); 3.88 (s, 3H, 4-OMe); 3.86 (s, 3H, 3-OMe); 2.51 (s, 3H,  $\text{H}\beta_{\text{a/b/c}}$ ).

$^{13}\text{C}$  NMR (176 MHz, acetone- $d_6$ )  $\delta$  196.4 (C $\alpha$ ); 154.4 (C4); 150.0 (C3); 131.2 (C1); 123.8 (C6); 111.3 (C5); 111.1 (C2); 56.1 (4-OMe); 55.9 (3-OMe); 26.3 (C $\beta$ ).

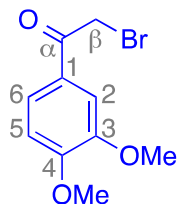

### $\beta$ -Bromo- $\alpha$ -(4-O-methyl)-guaiacylathanone [synthetic]:

$^1\text{H}$  NMR (700 MHz, acetone- $d_6$ )  $\delta$  7.72 (dd, 1H,  $J$  = 8.4, 2.1 Hz, H6); 7.55 (d, 1H,  $J$  = 2.1 Hz, H2); 7.08 (d, 1H,  $J$  = 8.4 Hz, H5); 4.69 (s, 2H,  $\text{H}\beta_{\text{a/b}}$ ); 3.92 (s, 3H, 4-OMe); 3.88 (s, 3H, 3-OMe).

$^{13}\text{C}$  NMR (176 MHz, acetone- $d_6$ )  $\delta$  190.5 (C $\alpha$ ); 155.1 (C4); 150.2 (C3); 127.9 (C1); 124.5 (C6); 111.8 (C5); 111.5 (C2); 56.2 (4-OMe); 56.0 (3-OMe); 32.5 (C $\beta$ ).

**Synthesis of  $\alpha$ -(4-O-methyl)-guaiacylathanone- $\beta$ -(1'-formyl)-guaiacyl ether (Fig. S2A).** To a 250-mL round-bottom flask containing a magnetically stirred solution of vanillin (2.4 g, 15.8 mmol) dissolved in acetone (60 mL), anhydrous  $K_2CO_3$  (4.3 g, 31.0 mmol) was added and the reaction mixture was set to reflux for 10 min.  $\beta$ -bromo- $\alpha$ -(4-O-methyl)-guaiacylathanone (4.0 g, 15.5 mmol) dissolved in acetone (20 mL) was then added and the resulting mixture was incubated at refluxing temperature for 2 h. Carbonates were then removed by filtration and the filtrate was evaporated *in vacuo*. The resulting residue was taken up with ethyl acetate and washed twice with aqueous 1 N NaOH, twice with  $H_2O$ , and once with brine. The organic layer was then dried over  $MgSO_4$  and the solvent was again evaporated *in vacuo*. The residue was then dissolved in hot ethanol and allowed to cool, affording crystalline  $\alpha$ -(4-O-methyl)-guaiacylathanone- $\beta$ -(1'-formyl)-guaiacyl ether (4.5 g, 87% yield).

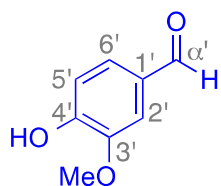

**vanillin [from Sigma-Aldrich]:**

$^1H$  NMR (700 MHz, acetone- $d_6$ )  $\delta$  9.83 (s, 1H,  $H_{\alpha'}$ ); 8.70 (s, 1H, 4'-OH); 7.46 (dd, 1H,  $J = 8.0, 1.8$  Hz,  $H_{6'}$ ); 7.44 (d, 1H,  $J = 1.8$  Hz,  $H_{2'}$ ); 7.01 (d, 1H,  $J = 8.0$  Hz,  $H_{5'}$ ); 3.93 (s, 3H, 3'-OMe).

$^{13}C$  NMR (176 MHz, acetone- $d_6$ )  $\delta$  191.0 ( $C_{\alpha'}$ ); 153.5 ( $C_{4'}$ ); 148.9 ( $C_{3'}$ ); 130.7 ( $C_{1'}$ ); 127.0 ( $C_{6'}$ ); 115.9 ( $C_{5'}$ ); 110.8 ( $C_{2'}$ ); 56.2 (3'-OMe).

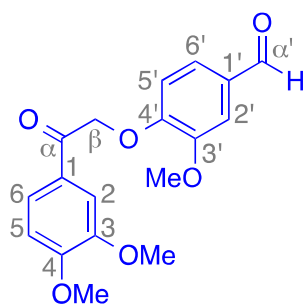

**$\alpha$ -(4-O-methyl)-guaiacylathanone- $\beta$ -(1'-formyl)-guaiacyl ether [synthetic]:**

$^1H$  NMR (700 MHz, acetone- $d_6$ )  $\delta$  9.86 (s, 1H,  $H_{\alpha'}$ ); 7.77 (dd, 1H,  $J = 8.4, 2.0$  Hz,  $H_6$ ); 7.59 (d, 1H,  $J = 2.0$  Hz,  $H_2$ ); 7.48 (dd, 1H,  $J = 8.7, 1.9$  Hz,  $H_{6'}$ ); 7.46 (d, 1H,  $J = 1.9$  Hz,  $H_{2'}$ ); 7.11 (d, 1H,  $J = 8.4$  Hz,  $H_5$ ); 7.06 (d, 1H,  $J = 8.7$  Hz,  $H_{5'}$ ); 5.63 (s, 2H,  $H_{\beta_{a/b}}$ ); 3.93 (s, 3H, 4-OMe); 3.92 (s, 3H, 3-OMe); 3.89 (s, 3H, 3'-OMe).

$^{13}C$  NMR (176 MHz, acetone- $d_6$ )  $\delta$  192.6 ( $C_{\alpha}$ ); 191.2 ( $C_{\alpha'}$ ); 155.1 ( $C_4$ ); 154.3 ( $C_{4'}$ ); 150.8 ( $C_{3'}$ ); 150.3 ( $C_3$ ); 131.6 ( $C_{1'}$ ); 128.4 ( $C_1$ ); 126.2 ( $C_6$ );

123.5 ( $C_6$ ); 113.5 ( $C_{5'}$ ); 111.6 ( $C_5$ ); 111.2 ( $C_2$ ); 110.9 ( $C_{2'}$ ); 71.4 ( $C_{\beta}$ ); 56.2 (4-OMe); 56.2 (3-OMe); 56.1 (3'-OMe).

**Synthesis of  $\alpha$ -(4-O-methyl)-guaiacylathanone- $\beta$ -(1'-formyl)-syringyl ether (Fig. S2B).** The synthesis of  $\alpha$ -(4-O-methyl)-guaiacylathanone- $\beta$ -(1'-formyl)-syringyl ether was carried out via the same procedure that yielded  $\alpha$ -(4-O-methyl)-guaiacylathanone- $\beta$ -(1'-formyl)-guaiacyl ether. In this case, the starting materials were syringaldehyde (2.9 g, 15.8 mmol), acetone (total volume: 80 mL), anhydrous  $K_2CO_3$  (4.3 g, 31.0 mmol), and  $\beta$ -bromo- $\alpha$ -(4-O-methyl)-guaiacylathanone (4.0 g, 15.5 mmol). From ethanol,  $\alpha$ -(4-O-methyl)-guaiacylathanone- $\beta$ -(1'-formyl)-syringyl ether was crystallized (4.7 g, 84% yield).

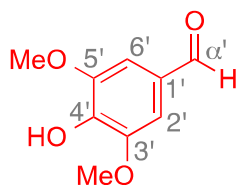

**Syringaldehyde [from Sigma-Aldrich]:**

$^1H$  NMR (700 MHz, acetone- $d_6$ )  $\delta$  9.82 (s, 1H,  $H_{\alpha'}$ ); 8.32 (s, 1H, 4'-OH); 7.24 (s, 2H,  $H_{2'}/H_{6'}$ ); 3.92 (s, 6H, 3'-OMe/5'-OMe).

$^{13}C$  NMR (176 MHz, acetone- $d_6$ )  $\delta$  191.1 ( $C_{\alpha'}$ ); 149.0 ( $C_{3'}/C_{5'}$ ); 142.9 ( $C_{4'}$ ); 129.0 ( $C_{1'}$ ); 107.7 ( $C_{2'}/C_{6'}$ ); 56.6 (3'-OMe/5'-OMe).

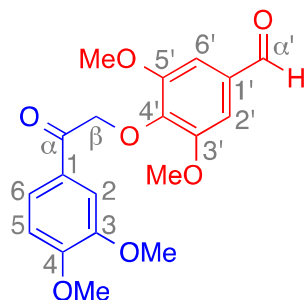

**$\alpha$ -(4-O-methyl)-guaiacyl ethanone- $\beta$ -(1'-formyl)-syringyl ether  
[synthetic]:**

$^1\text{H NMR}$  (700 MHz, acetone- $d_6$ )  $\delta$  9.91 (s, 1H,  $\text{H}\alpha'$ ); 7.77 (dd, 1H,  $J = 8.4$ , 2.0 Hz, H6); 7.60 (d, 1H,  $J = 2.0$  Hz, H2); 7.27 (s, 2H,  $\text{H}2'/\text{H}6'$ ); 7.08 (d, 1H,  $J = 8.4$  Hz, H5); 5.31 (s, 2H,  $\text{H}\beta_{\text{a/b}}$ ); 3.91 (s, 3H, 4-OMe); 3.89 (s, 6H, 3'-OMe/5'-OMe); 3.88 (s, 3H, 3-OMe).

$^{13}\text{C NMR}$  (176 MHz, acetone- $d_6$ )  $\delta$  193.2 ( $\text{C}\alpha$ ); 191.6 ( $\text{C}\alpha'$ ); 154.8 ( $\text{C}4$ ); 154.2 ( $\text{C}3'/\text{C}5'$ ); 150.1 ( $\text{C}3$ ); 142.7 ( $\text{C}4'$ ); 133.0 ( $\text{C}1'$ ); 128.9 ( $\text{C}1$ ); 123.7 ( $\text{C}6$ ); 111.5 ( $\text{C}2$ ); 111.4 ( $\text{C}5$ ); 107.5 ( $\text{C}2'/\text{C}6'$ ); 75.2 ( $\text{C}\beta$ ); 56.6 (3'-OMe/5'-OMe); 56.2 (4-OMe); 56.0 (3-OMe).

**Synthesis of racemic  $\alpha$ -(4-O-methyl)-guaiacylglycerone- $\beta$ -(1'-formyl)-guaiacyl ether, *racem*-G $\beta$ G (Fig. S2A).** To a magnetically stirred solution of 1,4-dioxane (30 mL),  $\alpha$ -(4-O-methyl)-guaiacyl ethanone- $\beta$ -(1'-formyl)-guaiacyl ether (1.4 g, 4.3 mmol), and formaldehyde (0.13 g, 4.44 mmol, 0.34 mL of 37% formaldehyde in  $\text{H}_2\text{O}$ ) in a 250-mL round-bottom flask, anhydrous  $\text{K}_2\text{CO}_3$  (1.2 g, 8.7 mmol) was added and the reaction mixture was set to 40 °C. After 3 h, the reaction was cooled to room temperature, carbonates were removed by filtration, and 1,4-dioxane was evaporated *in vacuo*. The residue was dissolved in ethyl acetate and washed three times with  $\text{H}_2\text{O}$  and once with brine. The organic layer was then dried over  $\text{MgSO}_4$  and the solvent evaporated *in vacuo*. Racemic  $\alpha$ -(4-O-methyl)-guaiacylglycerone- $\beta$ -(1'-formyl)-guaiacyl ether (*racem*-G $\beta$ G) was then crystallized from ethyl acetate and hexane (1.2 g, 79% yield). Enantiomers G $\beta$ (*S*)G and G $\beta$ (*R*)G were purified from crystalline *racem*-G $\beta$ G (50 mg, 138.8 nmol) by repetitive (8–10 injections) preparative chiral chromatography (See experimental procedures in main text for details) to provide enantiopure starting material for the synthesis of MTPA(*R*)-esters.

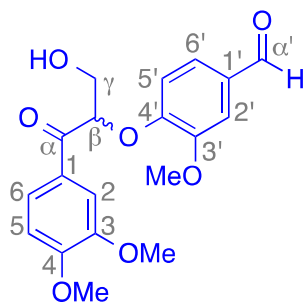

**$\alpha$ -(4-O-methyl)-guaiacylglycerone- $\beta$ -(1'-formyl)-guaiacyl ether, *racem*-G $\beta$ G [synthetic]:**

$^1\text{H NMR}$  (700 MHz, acetone- $d_6$ )  $\delta$  9.82 (s, 1H,  $\text{H}\alpha'$ ); 7.86 (dd, 1H,  $J = 8.5$ , 2.0 Hz, H6); 7.64 (d, 1H,  $J = 2.0$  Hz, H2); 7.44 (d, 1H,  $J = 1.9$  Hz,  $\text{H}2'$ ); 7.42 (dd, 1H,  $J = 8.2$ , 1.9 Hz,  $\text{H}6'$ ); 7.08 (d, 1H,  $J = 8.5$  Hz, H5); 6.98 (d, 1H,  $J = 8.2$  Hz,  $\text{H}5'$ ); 5.84 (t, 1H,  $J = 4.9$  Hz,  $\text{H}\beta$ ); 4.45 (t, 1H,  $J = 6.2$  Hz,  $\gamma$ -OH); 4.15 – 4.10 (m, 2H,  $\text{H}\gamma_{\text{a/b}}$ ); 3.91 (s, 3H, 4-OMe); 3.90 (s, 3H, 3-OMe); 3.86 (s, 3H, 3'-OMe).

$^{13}\text{C NMR}$  (176 MHz, acetone- $d_6$ )  $\delta$  194.7 ( $\text{C}\alpha$ ); 191.2 ( $\text{C}\alpha'$ ); 155.1 ( $\text{C}4$ ); 153.6 ( $\text{C}3'$ ); 150.9 ( $\text{C}3$ ); 150.1 ( $\text{C}4'$ ); 131.8 ( $\text{C}1'$ ); 128.9 ( $\text{C}1$ ); 126.2 ( $\text{C}6'$ );

124.2 ( $\text{C}6$ ); 114.6 ( $\text{C}5'$ ); 111.9 ( $\text{C}2$ ); 111.5 ( $\text{C}5$ ); 111.2 ( $\text{C}2'$ ); 83.3 ( $\text{C}\beta$ ); 63.9 ( $\text{C}\gamma$ ); 56.2 (4-OMe); 56.2 (3'-OMe); 56.0 (3-OMe).

**G $\beta$ (*S*)G:**

Analytical HPLC (column AD-H, Hexane/EtOH = 3/2, flow rate = 1.0 mL  $\text{min}^{-1}$ )  $t_{\text{R}} = 16.6$  min,  $R_{\text{f}} = 0.25$ . Preparative HPLC (column AY-H, Hexane/EtOH = 3/7–0/1 gradient, flow rate = 2.5 mL  $\text{min}^{-1}$ )  $t_{\text{R}} = 16.1$  min,  $R_{\text{f}} = 0.49$ .

**G $\beta$ (*R*)G:**

Analytical HPLC (column AD-H, Hexane/EtOH = 3/2, flow rate = 1.0 mL  $\text{min}^{-1}$ )  $t_{\text{R}} = 20.2$  min,  $R_{\text{f}} = 0.21$ . Preparative HPLC (column AY-H, Hexane/EtOH = 3/7–0/1 gradient, flow rate = 2.5 mL  $\text{min}^{-1}$ )  $t_{\text{R}} = 27.7$  min,  $R_{\text{f}} = 0.28$ .

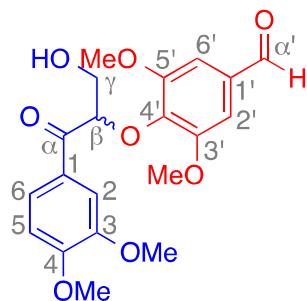

**$\alpha$ -(4-O-methyl)-guaiacylglycerone- $\beta$ -(1'-formyl)-guaiacyl ether, *racem*-G $\beta$ S [synthetic]:**

$^1\text{H NMR}$  (700 MHz, acetone- $d_6$ )  $\delta$  9.90 (s, 1H, H $\alpha'$ ); 7.80 (dd, 1H,  $J$  = 8.4, 2.0 Hz, H6); 7.63 (d, 1H,  $J$  = 2.0 Hz, H2); 7.26 (s, 2H, H2'/H6'); 7.07 (d, 1H,  $J$  = 8.4 Hz, H5); 5.52 (t, 1H,  $J$  = 5.4 Hz, H $\beta$ ); 3.93 – 3.89 (m, 2H, H $\gamma_{ab}$ ); 3.91 (s, 3H, 4-OMe); 3.88 (s, 3H, 3-OMe); 3.82 (s, 6H, 3'-OMe/5'-OMe).

$^{13}\text{C NMR}$  (176 MHz, acetone- $d_6$ )  $\delta$  194.6 (C $\alpha$ ); 191.6 (C $\alpha'$ ); 154.6 (C4); 153.8 (C3'/C5'); 150.1 (C3); 142.5 (C4'); 133.0 (C1'); 129.6 (C1); 124.2 (C6); 111.9 (C2); 111.4 (C5); 107.4 (C2'/C6'); 86.1 (C $\beta$ ); 63.9 (C $\gamma$ ); 56.6 (3'-OMe/5'-OMe); 56.1 (4-OMe); 56.0 (3-OMe).

**G $\beta$ (S)S:**

Analytical HPLC (column AD-H, Hexane/EtOH = 3/2, flow rate = 1.0 mL min $^{-1}$ )  $t_R$  = 16.0 min,  $R_f$  = 0.26.

**G $\beta$ (R)S:**

Analytical HPLC (column AD-H, Hexane/EtOH = 3/2, flow rate = 1.0 mL min $^{-1}$ )  $t_R$  = 18.1 min,  $R_f$  = 0.23.

**Synthesis of  $\beta$ -bromo- $\alpha$ -(4-O-methyl)-syringylethanone (Fig. S2C-D).** The synthesis of  $\beta$ -bromo- $\alpha$ -(4-O-methyl)-syringylethanone was carried out via the same procedure that yielded  $\beta$ -bromo- $\alpha$ -(4-O-methyl)-guaiacyl ethanone. In this case, the starting materials were  $\alpha$ -(4-O-methyl)-syringylethanone (3.0 g, 14.3 mmol) and pyridinium tribromide (4.8 g, 15.0 mmol) in ethyl acetate (50 mL). From methanol,  $\beta$ -bromo- $\alpha$ -(4-O-methyl)-syringylethanone was crystallized (2.7 g, 66% yield).

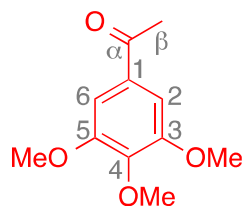

**$\alpha$ -(4-O-methyl)-syringylethanone [from Sigma-Aldrich]:**

$^1\text{H NMR}$  (700 MHz, acetone- $d_6$ )  $\delta$  7.30 (s, 2H, H2/H6); 3.90 (s, 6H, 3-OMe/5-OMe); 3.80 (s, 3H, 4-OMe); 2.56 (s, 3H, H $\beta_{a/b/c}$ ).

$^{13}\text{C NMR}$  (176 MHz, acetone- $d_6$ )  $\delta$  196.8 (C $\alpha$ ); 154.2 (C3/C5); 142.3 (C4); 133.5 (C1); 106.7 (C2/C6); 60.6 (4-OMe); 56.5 (3-OMe/5-OMe); 26.6 (C $\beta$ ).

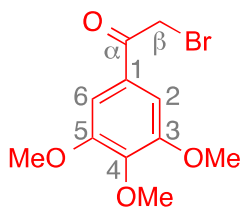

**$\beta$ -Bromo- $\alpha$ -(4-O-methyl)-syringylethanone [synthetic]:**

$^1\text{H NMR}$  (700 MHz, acetone- $d_6$ )  $\delta$  7.37 (s, 2H, H2/H6); 4.78 (s, 2H, H $\beta_{a/b}$ ); 3.91 (s, 6H, 3-OMe/5-OMe); 3.82 (s, 3H, 4-OMe).

$^{13}\text{C NMR}$  (176 MHz, acetone- $d_6$ )  $\delta$  190.9 (C $\alpha$ ); 154.3 (C3/C5); 144.1 (C4); 130.3 (C1); 107.3 (C2/C6); 60.7 (4-OMe); 56.6 (3-OMe/5-OMe); 33.0 (C $\beta$ ).

**Synthesis of  $\alpha$ -(4-O-methyl)-syringylethanone- $\beta$ -(1'-formyl)-guaiacyl ether (Fig. S2C).** The synthesis of  $\alpha$ -(4-O-methyl)-syringylethanone- $\beta$ -(1'-formyl)-guaiacyl ether was carried out via the same procedure that yielded  $\alpha$ -(4-O-methyl)-guaiacyl ethanone- $\beta$ -(1'-formyl)-guaiacyl ether. In this case, the starting materials were vanillin (0.4 g, 2.7 mmol), acetone (total volume: 30 mL), anhydrous  $\text{K}_2\text{CO}_3$  (0.7 g, 5.2 mmol), and  $\beta$ -bromo- $\alpha$ -(4-O-methyl)-syringylethanone (0.8 g, 2.6 mmol). From ethanol,  $\alpha$ -(4-O-methyl)-syringylethanone- $\beta$ -(1'-formyl)-guaiacyl ether was crystallized (0.9 g, 92% yield).

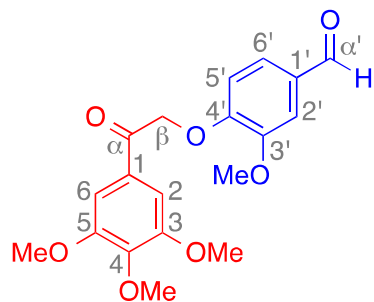

**$\alpha$ -(4-O-methyl)-syringylethanone- $\beta$ -(1'-formyl)-guaiacyl ether  
[synthetic]:**

$^1\text{H NMR}$  (700 MHz, acetone- $d_6$ )  $\delta$  9.86 (s, 1H,  $\text{H}\alpha'$ ); 7.48 (dd, 1H,  $J = 8.7, 1.9$  Hz,  $\text{H}6'$ ); 7.47 (d, 1H,  $J = 1.9$  Hz,  $\text{H}2'$ ); 7.41 (s, 2H,  $\text{H}2/\text{H}6$ ); 7.07 (d, 1H,  $J = 8.7$  Hz,  $\text{H}5'$ ); 5.68 (s, 2H,  $\text{H}\beta_{a/b}$ ); 3.94 (s, 3H, 3'-OMe); 3.91 (s, 6H, 3-OMe/5-OMe); 3.83 (s, 3H, 4-OMe).

$^{13}\text{C NMR}$  (176 MHz, acetone- $d_6$ )  $\delta$  193.1 ( $\text{C}\alpha$ ); 191.2 ( $\text{C}\alpha'$ ); 154.3 ( $\text{C}3/\text{C}5$ ); 154.1 ( $\text{C}4'$ ); 150.8 ( $\text{C}3'$ ); 144.1 ( $\text{C}4$ ); 131.6 ( $\text{C}1'$ ); 130.7 ( $\text{C}1$ ); 126.2 ( $\text{C}6'$ ); 113.5 ( $\text{C}5'$ ); 110.9 ( $\text{C}2'$ ); 106.5 ( $\text{C}2/\text{C}6$ ); 71.7 ( $\text{C}\beta$ ); 60.7 (4-OMe); 56.6 (3-OMe/5-OMe); 56.2 (3'-OMe).

**Synthesis of  $\alpha$ -(4-O-methyl)-syringylethanone- $\beta$ -(1'-formyl)-syringyl ether (Fig. S2D).** The synthesis of  $\alpha$ -(4-O-methyl)-syringylethanone- $\beta$ -(1'-formyl)-syringyl ether was carried out via the same procedure that yielded  $\alpha$ -(4-O-methyl)-guaiacylethanone- $\beta$ -(1'-formyl)-guaiacyl ether. In this case, the starting materials were syringaldehyde (0.5 g, 2.7 mmol), acetone (total volume: 30 mL), anhydrous  $\text{K}_2\text{CO}_3$  (0.7 g, 5.2 mmol), and  $\beta$ -bromo- $\alpha$ -(4-O-methyl)-syringylethanone (0.8 g, 2.6 mmol). From ethanol,  $\alpha$ -(4-O-methyl)-syringylethanone- $\beta$ -(1'-formyl)-syringyl ether was crystallized (0.9 g, 90% yield).

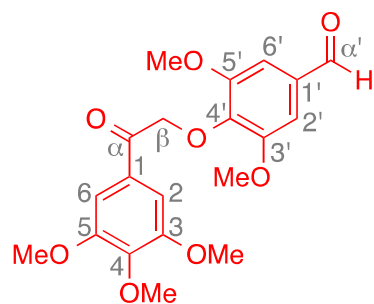

**$\alpha$ -(4-O-methyl)-syringylethanone- $\beta$ -(1'-formyl)-syringyl ether  
[synthetic]:**

$^1\text{H NMR}$  (700 MHz, acetone- $d_6$ )  $\delta$  9.91 (s, 1H,  $\text{H}\alpha'$ ); 7.40 (s, 2H,  $\text{H}2/\text{H}6$ ); 7.28 (s, 2H,  $\text{H}2'/\text{H}6'$ ); 5.34 (s, 2H,  $\text{H}\beta_{a/b}$ ); 3.90 (s, 6H, 3-OMe/5-OMe); 3.89 (s, 6H, 3'-OMe/5'-OMe); 3.82 (s, 3H, 4-OMe).

$^{13}\text{C NMR}$  (176 MHz, acetone- $d_6$ )  $\delta$  193.7 ( $\text{C}\alpha$ ); 191.6 ( $\text{C}\alpha'$ ); 154.3 ( $\text{C}3/\text{C}5$ ); 154.2 ( $\text{C}3'/\text{C}5'$ ); 143.8 ( $\text{C}4$ ); 142.6 ( $\text{C}4'$ ); 133.1 ( $\text{C}1'$ ); 131.1 ( $\text{C}1$ ); 107.5 ( $\text{C}2'/\text{C}6'$ ); 106.7 ( $\text{C}2/\text{C}6$ ); 75.3 ( $\text{C}\beta$ ); 60.6 (4-OMe); 56.6 (3'-OMe/5'-OMe); 56.5 (3-OMe/5-OMe).

**Synthesis of racemic  $\alpha$ -(4-O-methyl)-syringylglycerone- $\beta$ -(1'-formyl)-guaiacyl ether, *racem*-S $\beta$ G (Fig. S2C).** The synthesis of racemic  $\alpha$ -(4-O-methyl)-syringylglycerone- $\beta$ -(1'-formyl)-guaiacyl ether (*racem*-S $\beta$ G) was carried out via the same procedure that yielded *racem*-G $\beta$ G. In this case, the starting materials were  $\alpha$ -(4-O-methyl)-syringylethanone- $\beta$ -(1'-formyl)-guaiacyl ether (0.8 g, 2.2 mmol), formaldehyde (0.07 g, 2.3 mmol, 0.17 mL of 37% formaldehyde in  $\text{H}_2\text{O}$ ), 1,4-dioxane (20 mL), and anhydrous  $\text{K}_2\text{CO}_3$  (0.6 g, 4.4 mmol). From ethyl acetate and hexane, *racem*-S $\beta$ G was crystallized (0.7 g, 82% yield).

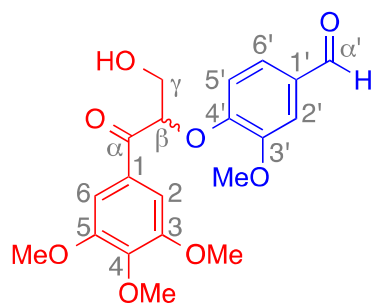

**$\alpha$ -(4-O-methyl)-syringylglycerone- $\beta$ -(1'-formyl)-guaiacyl ether, *racem*-S $\beta$ G [synthetic]:**

$^1\text{H NMR}$  (700 MHz, acetone- $d_6$ )  $\delta$  9.83 (s, 1H, H $\alpha'$ ); 7.48 (s, 2H, H2/H6); 7.44 (d, 1H,  $J$  = 1.9 Hz, H2'); 7.43 (dd, 1H,  $J$  = 8.0, 1.9 Hz, H6'); 7.01 (d, 1H,  $J$  = 8.0 Hz, H5'); 5.86 (t, 1H,  $J$  = 4.8 Hz, H $\beta$ ); 4.47 (t, 1H,  $J$  = 6.2 Hz,  $\gamma$ -OH); 4.16 (dd, 2H,  $J$  = 6.2, 4.8 Hz, H $\gamma_{a/b}$ ); 3.91 (s, 3H, 3'-OMe); 3.89 (s, 6H, 3-OMe/5-OMe); 3.81 (s, 3H, 4-OMe).

$^{13}\text{C NMR}$  (176 MHz, acetone- $d_6$ )  $\delta$  195.4 (C $\alpha$ ); 191.2 (C $\alpha'$ ); 154.2 (C3/C5); 153.5 (C4'); 150.9 (C3'); 145.5 (C4); 131.8 (C1'); 131.1 (C1); 126.2 (C6'); 114.6 (C5'); 111.2 (C2'); 107.2 (C2/C6); 83.5 (C $\beta$ ); 63.9

(C $\gamma$ ); 60.6 (4-OMe); 56.5 (3-OMe/5-OMe); 56.2 (3'-OMe).

**S $\beta$ (S)G:**

Analytical HPLC (column AY-H, Hexane/EtOH = 1/1, flow rate = 2.5 mL min $^{-1}$ )  $t_R$  = 16.7 min,  $R_f$  = 0.47.

**S $\beta$ (R)G:**

Analytical HPLC (column AY-H, Hexane/EtOH = 1/1, flow rate = 2.5 mL min $^{-1}$ )  $t_R$  = 19.5 min,  $R_f$  = 0.40.

**Synthesis of racemic  $\alpha$ -(4-O-methyl)-syringylglycerone- $\beta$ -(1'-formyl)-syringyl ether, *racem*-S $\beta$ S (Fig. S2D).**

The synthesis of racemic  $\alpha$ -(4-O-methyl)-syringylglycerone- $\beta$ -(1'-formyl)-syringyl ether (*racem*-S $\beta$ S) was carried out via the same procedure that yielded *racem*-G $\beta$ G. In this case, the starting materials were  $\alpha$ -(4-O-methyl)-syringylethanone- $\beta$ -(1'-formyl)-syringyl ether (0.8 g, 2.1 mmol), formaldehyde (0.06 g, 2.1 mmol, 0.16 mL of 37% formaldehyde in H $_2$ O), 1,4-dioxane (20 mL), and anhydrous K $_2$ CO $_3$  (0.6 g, 4.1 mmol). From ethyl acetate and hexane, *racem*-S $\beta$ S was crystallized (0.7 g, 78% yield). Enantiomers S $\beta$ (R)S and S $\beta$ (S)S were purified from crystalline *racem*-S $\beta$ S (50 mg, 118.9 nmol) by repetitive (8–10 injections) preparative chiral chromatography (See experimental procedures in main text for details) to provide enantiopure starting material for the synthesis of S $\beta$ S-MTPA(R) esters.

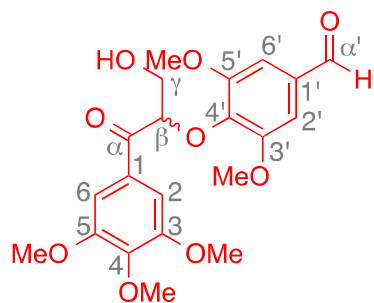

**$\alpha$ -(4-O-methyl)-syringylglycerone- $\beta$ -(1'-formyl)-syringyl ether, *racem*-S $\beta$ S [synthetic]:**

$^1\text{H NMR}$  (700 MHz, acetone- $d_6$ )  $\delta$  9.90 (s, 1H, H $\alpha'$ ); 7.43 (s, 2H, H2/H6); 7.27 (s, 2H, H2'/H6'); 5.57 (t, 1H,  $J$  = 5.3 Hz, H $\beta$ ); 3.93 (d, 2H,  $J$  = 5.3 Hz, H $\gamma_{a/b}$ ); 3.89 (s, 6H, 3-OMe/5-OMe); 3.84 (s, 6H, 3'-OMe/5'-OMe); 3.82 (s, 3H, 4-OMe).

$^{13}\text{C NMR}$  (176 MHz, acetone- $d_6$ )  $\delta$  195.2 (C $\alpha$ ); 191.6 (C $\alpha'$ ); 154.1 (C3/C5); 153.8 (C3'/C5'); 143.6 (C4); 142.4 (C4'); 133.0 (C1'); 132.0 (C1); 107.4 (C2'/C6'); 107.2 (C2/C6); 85.8 (C $\beta$ ); 63.7 (C $\gamma$ ); 60.6 (4-OMe); 56.6 (3'-OMe/5'-OMe); 56.5 (3-OMe/5-OMe).

**S $\beta$ (R)S:**

Analytical HPLC (column AY-H, Hexane/EtOH = 1/1, flow rate = 2.5 mL min $^{-1}$ )  $t_R$  = 18.4 min,  $R_f$  = 0.43.

Preparative HPLC (column AY-H, Hexane/EtOH = 7/3, flow rate = 2.5 mL min $^{-1}$ )  $t_R$  = 20.6 min,  $R_f$  = 0.38.

**S $\beta$ (S)S:**

Analytical HPLC (column AY-H, Hexane/EtOH = 1/1, flow rate = 2.5 mL min $^{-1}$ )  $t_R$  = 24.2 min,  $R_f$  = 0.32.

Preparative HPLC (column AY-H, Hexane/EtOH = 7/3, flow rate = 2.5 mL min $^{-1}$ )  $t_R$  = 27.9 min,  $R_f$  = 0.28.



## ASSIGNMENT OF ABSOLUTE CONFIGURATIONS TO S $\beta$ (S)S AND S $\beta$ (R)S:

**General.** To test whether S $\beta$ (R)S elutes prior to the S $\beta$ (S)S, or if the Lig  $\beta$ -etherases exhibited alternative stereospecificities for S $\beta$ S enantiomers, we used a modification of Mosher's method to determine the absolute configuration of each isomer.<sup>10</sup> Using chiral chromatography, we purified a total of four enantiomers: two from *racem*-G $\beta$ G with known absolute configurations, G $\beta$ (S)G and G $\beta$ (R)G,<sup>11</sup> as well as two from *racem*-S $\beta$ S with unknown absolute  $\beta$ -configuration, low- $t_R$  S $\beta$ S, and high- $t_R$  S $\beta$ S.

**Preparative separation of G $\beta$ G enantiomers.** To separate enantiomers G $\beta$ (S)G and G $\beta$ (R)G, crystalline *racem*-G $\beta$ G (5.0 mg, 13.9 nmol) was dissolved in ethanol (5 mL) and injected into a CHIRALPAK AY-H column (10 by 250 mm). A mixture of ethanol and hexane was used as the mobile phase at a flow rate of 2.5 mL min.<sup>-1</sup> The ethanol fraction of the total flow (with hexane as the remainder) was adjusted over a gradient as follows: 0–8 min, 70% ethanol; 8–14 min, gradient from 70–100% ethanol; 14–35 min, 100% ethanol; 35–38 min, gradient from 100–70% ethanol; 38–45 min, 70% ethanol. Fractions containing G $\beta$ (S)G (15–22 min) and G $\beta$ (R)G (26–34 min) (Fig. S3A) were collected, pooled, and solvents were dried *in vacuo*. The aforementioned procedure was repeated four additional times in order to collect approximately 25 mg of each enantiomer. To aid in the assignment of absolute configuration to carbon  $\beta$ , enantiopure G $\beta$ (S)G and G $\beta$ (R)G were used as starting materials for syntheses of  $\alpha$ (R)-methoxy-trifluoromethyl-phenylacetate (MTPA(R)) esters G $\beta$ (S)G-MTPA(R) and G $\beta$ (R)G-MTPA(R) (see below).  $\beta$ -Etherase assays with SsLigF1 confirmed that the low- $t_R$  enantiomer (15–22 min) eluting from the AY-H column was G $\beta$ (S)G whereas assays with SsLigE indicated that the high- $t_R$  enantiomer (26–34 min) was G $\beta$ (R)G (see Results for details).

**Preparative separation of S $\beta$ S enantiomers.** To separate enantiomers S $\beta$ (R)S and S $\beta$ (S)S, crystalline *racem*-S $\beta$ S (5.0 mg, 11.9 nmol) was dissolved in ethanol (5 mL) and injected into a CHIRALPAK AY-H column (10 by 250 mm) using a 7/3 mixture of hexane/ethanol as the mobile phase at a flow rate of 2.5 mL min.<sup>-1</sup> Fractions containing S $\beta$ (R)S (20–26 min) (Fig. S3B) and S $\beta$ (S)S (28–36 min) were collected, pooled, and solvents were dried *in vacuo*. The aforementioned procedure was repeated four additional times in order to collect approximately 25 mg of each enantiomer for use in syntheses of S $\beta$ S-MTPA(R) esters.

**General procedure for syntheses of MTPA(R) esters.** Enantiopure preparations of G $\beta$ (S)G, G $\beta$ (R)G, S $\beta$ (R)S, and S $\beta$ (S)S were obtained via preparative chiral chromatography (Fig. S3). In four parallel reactions, the C $\gamma$ -OH moieties of G $\beta$ G enantiomers (10 mg, 27.8 nmol) and S $\beta$ S enantiomers (10 mg, 23.8 nmol) were acylated using  $\alpha$ (S)-methoxy-trifluoromethyl-phenyl-acetyl chloride (MTPACl(S)), producing four diastereometric MTPA(R) C $\gamma$ -esters. Phenylacetylation of G $\beta$ (S)G ( $t_R$  = 15.1 min) and G $\beta$ (R)G ( $t_R$  = 29.6 min) yielded G $\beta$ (S)G-MTPA(R) and G $\beta$ (R)G-MTPA(R), respectively. Phenylacetylation of S $\beta$ (R)S ( $t_R$  = 27.6 min) and S $\beta$ (S)S ( $t_R$  = 37.3 min) yielded S $\beta$ (R)S-MTPA(R) and S $\beta$ (S)S-MTPA(R), respectively.

**General procedure for synthesis of G $\beta$ G-propenone.** Because both the G $\beta$ (S)G-MTPA(R) and the G $\beta$ (R)G-MTPA(R) preparations contained small amounts of contaminating  $\alpha$ -(4-O-Me)-guaiacyl- $\beta$ , $\gamma$ -propenone- $\beta$ -(1'-formyl)-guaiacyl ether (G $\beta$ G-propenone), an additional reaction was carried out (over an extended reaction period) to synthesize pure G $\beta$ G-propenone. Using *racem*-G $\beta$ G (30 mg, 83.3 nmol) and MTPACl(S) as starting materials in a 2 h reaction, pure G $\beta$ G-propenone was obtained and subsequently used as a standard for identifying the desired <sup>1</sup>H and <sup>13</sup>C resonances in the G $\beta$ (S)G-MTPA(R) and G $\beta$ (R)G-MTPA(R) NMR spectra.

**Synthesis of  $\beta$ (S)-(1'-formyl)-guaiacyl- $\alpha$ -(4-O-methyl)-guaiacylglyceryl  $\alpha'$ (R)-methoxy-trifluoromethyl-phenyl acetate, G $\beta$ (S)G-MTPA(R) (Fig. S3).** In a 50-mL conical flask with magnetic stirring at 0 °C, a solution of G $\beta$ (S)G (10 mg, 28 nmol), diisopropylethylamine (7 mg, 55 nmol, 10  $\mu$ L), and dimethylaminopyridine (2 mg, 14 nmol) dissolved in dichloromethane (2.0 mL),  $\alpha'$ (S)-methoxyl-

trifluoromethyl-phenyl acetyl chloride [MTPACl(*S*)] (28 mg, 111 nmol, 21  $\mu$ L) was added dropwise. After 5 min, the reaction was collected in a Pasteur pipette and loaded onto an 8 g RediSep®*R<sub>f</sub>* flash chromatography column, with which dichloromethane (20 mL) was used as the mobile phase. The column removed residual diisopropylethylamine, dimethylaminopyridine, and  $\alpha''$ (*S*)-methoxyl-trifluoromethyl-phenyl acetyl chloride, whereas the product MTPA(*R*) ester was collected from flow-through fractions. Dichloromethane was then evaporated *in vacuo* and the oil containing the desired product was analyzed by NMR spectroscopy. Integration of the  $^1\text{H}$  NMR spectral regions for protons  $\gamma\text{H}_a$  and  $\gamma\text{H}_b$  revealed that the reaction products were a ~2:1 mixture  $\beta$ (*S*)-(1'-formyl)-guaiacyl- $\alpha$ -(4-O-methyl)-guaiacylglyceryl  $\alpha''$ (*R*)-methoxyl-trifluoromethyl-phenyl acetate, [G $\beta$ (*S*)G-MTPA(*R*)] (6 mg, 38% yield) and a contaminant which was found to be a  $\beta,\gamma$ -unsaturated alkene, G $\beta$ G-propenone (2 mg, 21% yield).

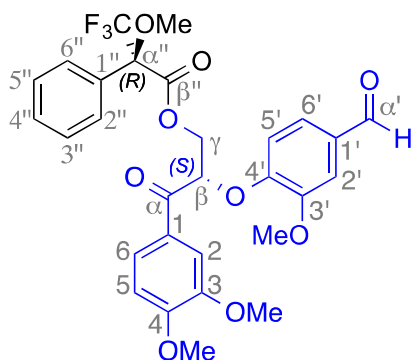

**$\beta$ (*S*)-(1'-formyl)-guaiacyl- $\alpha$ -(4-O-methyl)-guaiacylglyceryl  $\alpha''$ (*R*)-methoxyl-trifluoromethyl-phenyl acetate, G $\beta$ (*S*)G-MTPA(*R*) [synthetic]:**

$^1\text{H}$  NMR (700 MHz, acetone-*d*<sub>6</sub>)  $\delta$  9.85 (s, 1H, H $\alpha'$ ); 7.86 (dd, 1H, *J* = 8.5, 2.0 Hz, H6); 7.61 (d, 1H, *J* = 2.0 Hz, H2); 7.51 (d, 2H, *J* = 7.8 Hz, H3''/H5''); 7.45 (d, 1H, *J* = 1.8 Hz, H2'); 7.43 – 7.35 (m, 3H, H2''/H6''/H4''); 7.41 (dd, 1H, *J* = 8.3, 1.8 Hz, H6'); 7.08 (d, 1H, *J* = 8.5 Hz, H5); 6.99 (d, 1H, *J* = 8.3 Hz, H5'); 6.26 (dd, 1H, *J* = 6.6, 3.2 Hz, H $\beta$ ); 4.99 (dd, 1H, *J* = 12.2, 3.2 Hz, H $\gamma_a$ ); 4.91 (dd, 1H, *J* = 12.2, 6.6 Hz, H $\gamma_b$ ); 3.92 (s, 3H, 4-OMe); 3.84 (s, 3H, 3-OMe); 3.83 (s, 3H, 3'-OMe); 3.51 (bs, 3H,  $\alpha''$ -OMe).

$^{13}\text{C}$  NMR (176 MHz, acetone-*d*<sub>6</sub>)  $\delta$  192.6 (C $\alpha$ ); 191.2 (C $\alpha'$ ); 166.9 (C $\beta''$ ); 155.4 (C4); 152.6 (C4'); 151.0 (C3'); 150.2 (C3); 132.8 (C1''); 132.3 (C1'); 130.5 (C4''); 129.2 (C2''/C6''); 128.3 (C1); 128.3 (C3''/C5''); 126.0 (C6'); 124.3 (C6); 124.2 ( $\alpha''$ -CF<sub>3</sub>); 115.3 (C5'); 111.7 (C2); 111.6 (C2'); 111.5 (C5); 85.7 ( $\alpha''$ ); 78.7 (C $\beta$ ); 66.5 (C $\gamma$ ); 56.3 (4-OMe); 56.3 (3'-OMe); 56.0 (3-OMe); 55.9 ( $\alpha''$ -OMe).

**Synthesis of  $\beta$ (*R*)-(1'-formyl)-guaiacyl- $\alpha$ -(4-O-methyl)-guaiacylglyceryl  $\alpha''$ (*R*)-methoxyl-trifluoromethyl-phenyl acetate, G $\beta$ (*R*)G-MTPA(*R*) (Fig. S3).** The synthesis of  $\beta$ (*R*)-(1'-formyl)-guaiacyl- $\alpha$ -(4-O-methyl)-guaiacylglyceryl  $\alpha''$ (*R*)-methoxyl-trifluoromethyl-phenyl acetate [G $\beta$ (*R*)G-MTPA(*R*)] was carried out via the same procedure that yielded G $\beta$ (*S*)G-MTPA(*R*). However, since G $\beta$ (*R*)G-MTPA(*R*) was the desired product, G $\beta$ (*R*)G (10 mg, 28 nmol) was used as the starting material [instead of G $\beta$ (*S*)G]. Integration of the  $^1\text{H}$  NMR spectral regions for protons  $\gamma\text{H}_a$  and  $\gamma\text{H}_b$  revealed that the reaction products were a ~2:1 mixture G $\beta$ (*R*)G-MTPA(*R*) (7 mg, 44% yield) and G $\beta$ G-propenone (2 mg, 21% yield).

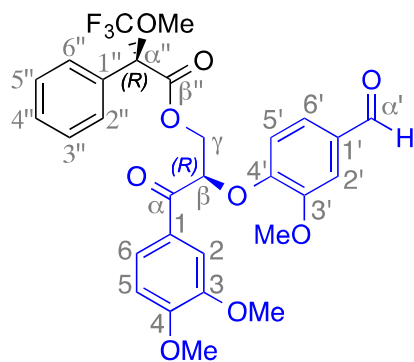

**$\beta(R)$ -(1'-formyl)-guaiacyl- $\alpha$ -(4-O-methyl)-guaiacylglyceryl  $\alpha''(R)$ -methoxyl-trifluoromethyl-phenyl acetate,  $G\beta(R)G$ -MTPA( $R$ ) [synthetic]:**

$^1\text{H}$  NMR (700 MHz, acetone- $d_6$ )  $\delta$  9.85 (s, 1H,  $H_{\alpha'}$ ); 7.84 (dd, 1H,  $J = 8.5, 2.0$  Hz, H6); 7.58 (d, 1H,  $J = 2.0$  Hz, H2); 7.51 (d, 2H,  $J = 7.8$  Hz, H3''/H5''); 7.47 (d, 1H,  $J = 1.8$  Hz, H2'); 7.42 – 7.33 (m, 3H, H2''/H6''/H4''); 7.42 (dd, 1H,  $J = 8.3, 1.8$  Hz, H6'); 7.08 (d, 1H,  $J = 8.5$  Hz, H5); 6.99 (d, 1H,  $J = 8.3$  Hz, H5'); 6.29 (dd, 1H,  $J = 6.1, 3.1$  Hz, H $\beta$ ); 5.10 (dd, 1H,  $J = 12.2, 3.1$  Hz,  $H_{\gamma_a}$ ); 4.86 (dd, 1H,  $J = 12.2, 6.1$  Hz,  $H_{\gamma_b}$ ); 3.92 (s, 3H, 4-OMe); 3.88 (s, 3H, 3-OMe); 3.84 (s, 3H, 3'-OMe); 3.57 (bs, 3H,  $\alpha''$ -OMe).

$^{13}\text{C}$  NMR (176 MHz, acetone- $d_6$ )  $\delta$  192.3 (C $\alpha$ ); 191.2 (C $\alpha'$ ); 166.9 (C $\beta''$ ); 155.4 (C4); 152.6 (C4'); 151.0 (C3'); 150.2 (C3); 132.8 (C1''); 132.3 (C1'); 130.5 (C4''); 129.2 (C2''/C6''); 128.2 (C1); 128.2 (C3''/C5''); 125.9 (C6'); 124.2 (C6); 124.2 ( $\alpha''$ -CF $_3$ ); 115.2 (C5'); 111.7 (C2); 111.6 (C2'); 111.5 (C5); 85.5 ( $\alpha''$ ); 78.7 (C $\beta$ ); 66.5 (C $\gamma$ ); 56.3 (4-OMe); 56.3 (3'-OMe); 56.1 (3-OMe); 56.0 ( $\alpha''$ -OMe).

**Synthesis of  $\alpha$ -(4-O-methyl)-guaiacyl- $\beta,\gamma$ -propenone- $\beta$ -(1'-formyl)-guaiacyl ether,  $G\beta G$ -propenone.**

So that the  $^1\text{H}$  and  $^{13}\text{C}$  NMR spectral regions of the contaminating  $\beta,\gamma$ -unsaturated alkene could be identified in the  $G\beta(S)G$ -MTPA( $R$ ) and  $G\beta(R)G$ -MTPA( $R$ ) reaction products, we synthesized  $\alpha$ -(4-O-methyl)-guaiacyl- $\beta,\gamma$ -propenone- $\beta$ -(1'-formyl)-guaiacyl ether ( $G\beta G$ -propenone). The synthesis of  $G\beta G$ -propenone was carried out via the same procedures that yielded  $G\beta(S)G$ -MTPA( $R$ ) and  $G\beta(R)G$ -MTPA( $R$ ). In this case, the starting materials were *racem*- $G\beta G$  (30 mg, 83 nmol), diisopropylethylamine (21 mg, 165 nmol, 30  $\mu\text{L}$ ), and dimethylaminopyridine (6 mg, 42 nmol) dissolved in dichloromethane (4.0 mL), with dropwise addition of MTPACl( $S$ ) (83 mg, 333 nmol, 63  $\mu\text{L}$ ). Further, the reaction was incubated for a period of 2 h (rather than 5 min) after the addition of MTPACl( $S$ ) to enable MTPA( $R$ ) elimination and formation of  $G\beta G$ -propenone to reach completion. After the extended reaction period, neither  $G\beta(S)G$ -MTPA( $R$ ), nor  $G\beta(R)G$ -MTPA( $R$ ) was found in the products.  $^1\text{H}$  and  $^{13}\text{C}$  NMR revealed that the reaction had afforded pure  $G\beta G$ -propenone (20 mg, 70% yield).

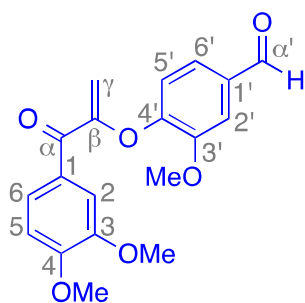

**$\alpha$ -(4-O-methyl)-guaiacyl- $\beta,\gamma$ -propenone- $\beta$ -(1'-formyl)-guaiacyl ether,  $G\beta G$ -propenone, [synthetic]:**

$^1\text{H}$  NMR (700 MHz, acetone- $d_6$ )  $\delta$  9.94 (s, 1H,  $H_{\alpha'}$ ); 7.77 (dd, 1H,  $J = 8.4, 2.0$  Hz, H6); 7.58 (d, 1H,  $J = 1.8$  Hz, H2'); 7.56 (d, 1H,  $J = 2.0$  Hz, H2); 7.55 (dd, 1H,  $J = 8.0, 1.8$  Hz, H6''); 7.25 (d, 1H,  $J = 8.0$  Hz, H5'); 7.08 (d, 1H,  $J = 8.4$  Hz, H5); 5.37 (d, 1H,  $J = 2.4$  Hz,  $H_{\gamma_a}$ ); 5.08 (d, 1H,  $J = 2.4$  Hz,  $H_{\gamma_b}$ ); 3.96 (s, 3H, 3'-OMe); 3.91 (s, 3H, 4-OMe); 3.88 (s, 3H, 3-OMe).

$^{13}\text{C}$  NMR (176 MHz, acetone- $d_6$ )  $\delta$  191.5 (C $\alpha'$ ); 188.4 (C $\alpha$ ); 157.4 (C $\beta$ ); 154.8 (C4); 151.9 (C3'); 150.0 (C4'); 149.9 (C3); 134.7 (C1'); 129.3 (C1); 125.4 (C6); 125.4 (C6'); 120.6 (C5'); 112.8 (C2); 112.4 (C2'); 111.3 (C5); 104.0 (C $\gamma$ ); 56.4 (3'-OMe); 56.2 (4-OMe); 56.0 (3-OMe).

**Synthesis of  $\beta(R)$ -(1'-formyl)-syringyl- $\alpha$ -(4-O-methyl)-syringylglyceryl  $\alpha''(R)$ -methoxyl-trifluoromethyl-phenyl acetate,  $S\beta(R)S$ -MTPA( $R$ ) (Fig. S3).** In a 50-mL conical flask with magnetic stirring at 0  $^\circ\text{C}$ , a solution of  $S\beta(R)S$  (12 mg, 28 nmol), diisopropylethylamine (7 mg, 55 nmol, 10  $\mu\text{L}$ ), and dimethylaminopyridine (2 mg, 14 nmol) dissolved in dichloromethane (2.0 mL), MTPACl( $S$ ) (28 mg, 111 nmol, 21  $\mu\text{L}$ ) was added dropwise. After 5 min, the reaction was collected in a Pasteur pipette and loaded onto an 8 g RediSep $^{\text{R}}$  $_f$  flash chromatography column, with which dichloromethane (20 mL) was used as the mobile phase. The column removed residual diisopropylethylamine, dimethylaminopyridine,

and  $\alpha''(S)$ -methoxyl-trifluoromethyl-phenyl acetyl chloride, whereas the product MTPA(*R*) ester was collected from flow-through fractions. Dichloromethane was then evaporated *in vacuo* and the oil containing the desired product was analyzed by NMR spectroscopy.  $^1\text{H}$  and  $^{13}\text{C}$  NMR revealed that the reaction had afforded essentially pure  $\beta(R)$ -(1'-formyl)-syringyl- $\alpha$ -(4-O-methyl)-syringylglyceryl  $\alpha''(R)$ -methoxyl-trifluoromethyl-phenyl acetate [ $\text{S}\beta(R)\text{S-MTPA}(R)$ ] (10 mg, 65% yield).

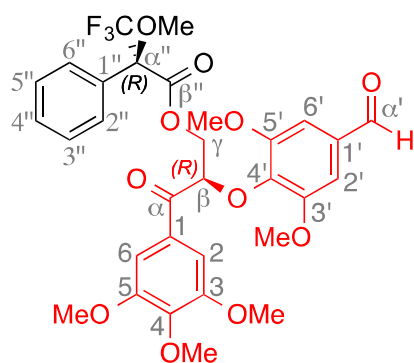

**$\beta(R)$ -(1'-formyl)-syringyl- $\alpha$ -(4-O-methyl)-syringylglyceryl  $\alpha''(R)$ -methoxyl-trifluoromethyl-phenyl acetate,  $\text{S}\beta(R)\text{S-MTPA}(R)$  [synthetic]:**

$^1\text{H}$  NMR (700 MHz, acetone- $d_6$ )  $\delta$  9.88 (s, 1H,  $\text{H}\alpha'$ ); 7.46 – 7.36 (m, 5H,  $\text{H}2''/\text{H}3''/\text{H}4''/\text{H}5''/\text{H}6''$ ); 7.37 (s, 2H,  $\text{H}2/\text{H}6$ ); 7.22 (s, 2H,  $\text{H}2'/\text{H}6'$ ); 6.13 (dd, 1H,  $J = 5.3, 4.2$  Hz,  $\text{H}\beta$ ); 5.00 (dd, 1H,  $J = 11.9, 4.2$  Hz,  $\text{H}\gamma_a$ ); 4.68 (dd, 1H,  $J = 11.9, 5.3$  Hz,  $\text{H}\gamma_b$ ); 3.84 (s, 6H, 3-OMe/5-OMe); 3.82 (s, 3H, 4-OMe); 3.80 (s, 6H, 3'-OMe/5'-OMe); 3.51 (bs, 3H,  $\alpha''$ -OMe).

$^{13}\text{C}$  NMR (176 MHz, acetone- $d_6$ )  $\delta$  193.4 ( $\text{C}\alpha$ ); 191.6 ( $\text{C}\alpha'$ ); 166.8 ( $\text{C}\beta''$ ); 154.1 ( $\text{C}3/\text{C}5$ ); 153.7 ( $\text{C}3'/\text{C}5'$ ); 143.9 ( $\text{C}4$ ); 141.2 ( $\text{C}4'$ ); 133.1 ( $\text{C}1'$ ); 132.8 ( $\text{C}1$ ); 131.3 ( $\text{C}1''$ ); 130.5 ( $\text{C}4''$ ); 129.2 ( $\text{C}2''/\text{C}6''$ ); 128.2 ( $\text{C}3''/\text{C}5''$ ); 124.2 ( $\alpha''$ - $\text{CF}_3$ ); 107.3 ( $\text{C}2'/\text{C}6'$ ); 107.2 ( $\text{C}2/\text{C}6$ ); 85.3 ( $\alpha''$ ); 80.4 ( $\text{C}\beta$ ); 66.9 ( $\text{C}\gamma$ ); 60.7 (4-OMe); 56.5 (3'-OMe/5'-OMe); 56.5 (3-OMe/5-OMe); 55.9 ( $\alpha''$ -OMe).

**Synthesis of  $\beta(S)$ -(1'-formyl)-syringyl- $\alpha$ -(4-O-methyl)-syringylglyceryl  $\alpha''(R)$ -methoxyl-trifluoromethyl-phenyl acetate,  $\text{S}\beta(S)\text{S-MTPA}(R)$  (Fig. S3).** The synthesis of  $\beta(S)$ -(1'-formyl)-syringyl- $\alpha$ -(4-O-methyl)-syringylglyceryl  $\alpha''(R)$ -methoxyl-trifluoromethyl-phenyl acetate [ $\text{S}\beta(S)\text{S-MTPA}(R)$ ] was carried out via the same procedure that yielded  $\text{S}\beta(R)\text{S-MTPA}(R)$ . However, since  $\text{S}\beta(S)\text{S-MTPA}(R)$  was the desired product,  $\text{S}\beta(S)\text{S}$  (12 mg, 28 nmol) was used as the starting material [instead of  $\text{S}\beta(R)\text{S}$ ].  $^1\text{H}$  and  $^{13}\text{C}$  NMR revealed that the reaction had afforded essentially pure  $\text{S}\beta(S)\text{S-MTPA}(R)$  (9 mg, 59% yield).

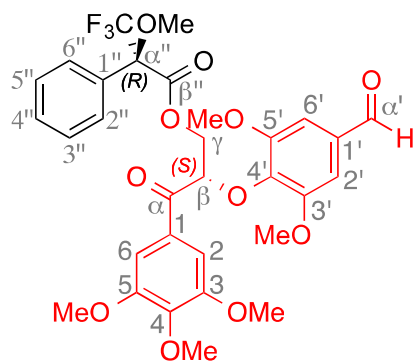

**$\beta(S)$ -(1'-formyl)-syringyl- $\alpha$ -(4-O-methyl)-syringylglyceryl  $\alpha''(R)$ -methoxyl-trifluoromethyl-phenyl acetate,  $\text{S}\beta(S)\text{S-MTPA}(R)$  [synthetic]:**

$^1\text{H}$  NMR (700 MHz, acetone- $d_6$ )  $\delta$  9.88 (s, 1H,  $\text{H}\alpha'$ ); 7.47 – 7.36 (m, 5H,  $\text{H}2''/\text{H}3''/\text{H}4''/\text{H}5''/\text{H}6''$ ); 7.40 (s, 2H,  $\text{H}2/\text{H}6$ ); 7.21 (s, 2H,  $\text{H}2'/\text{H}6'$ ); 6.08 (dd, 1H,  $J = 5.8, 4.2$  Hz,  $\text{H}\beta$ ); 4.92 (dd, 1H,  $J = 11.9, 4.2$  Hz,  $\text{H}\gamma_a$ ); 4.77 (dd, 1H,  $J = 11.9, 5.8$  Hz,  $\text{H}\gamma_b$ ); 3.85 (s, 6H, 3-OMe/5-OMe); 3.81 (s, 3H, 4-OMe); 3.76 (s, 6H, 3'-OMe/5'-OMe); 3.45 (bs, 3H,  $\alpha''$ -OMe).

$^{13}\text{C}$  NMR (176 MHz, acetone- $d_6$ )  $\delta$  193.6 ( $\text{C}\alpha$ ); 191.6 ( $\text{C}\alpha'$ ); 166.9 ( $\text{C}\beta''$ ); 154.1 ( $\text{C}3/\text{C}5$ ); 153.6 ( $\text{C}3'/\text{C}5'$ ); 143.9 ( $\text{C}4$ ); 141.3 ( $\text{C}4'$ ); 133.1 ( $\text{C}1'$ ); 132.7 ( $\text{C}1$ ); 131.3 ( $\text{C}1''$ ); 130.5 ( $\text{C}4''$ ); 129.2 ( $\text{C}2''/\text{C}6''$ ); 128.2 ( $\text{C}3''/\text{C}5''$ ); 124.2 ( $\alpha''$ - $\text{CF}_3$ ); 107.3 ( $\text{C}2'/\text{C}6'$ ); 107.3 ( $\text{C}2/\text{C}6$ ); 85.6 ( $\alpha''$ ); 80.3 ( $\text{C}\beta$ ); 66.9 ( $\text{C}\gamma$ ); 60.7 (4-OMe); 56.5 (3'-OMe/5'-OMe); 56.5 (3-OMe/5-OMe); 55.9 ( $\alpha''$ -OMe).

**Analysis of  $^1\text{H}$  NMR spectra for assignment of absolute configurations to  $\text{S}\beta(\text{S})\text{S}$  and  $\text{S}\beta(\text{R})\text{S}$ .** Given that (a) SsLigE and SsLigP each cleaves a diguaiacyl  $\beta(\text{R})$ -ether bond and SsLigF1 degrades the  $\beta(\text{S})$ -enantiomer,<sup>5, 11-13</sup> (b) the low- $t_{\text{R}}$  G $\beta$ G enantiomer was cleaved by SsLigF1 (Fig. 2H), and (c) the high- $t_{\text{R}}$  G $\beta$ G enantiomer was cleaved by both SsLigE (Fig. 2D) and SsLigP (Fig. 2E), we have assigned the absolute  $\beta(\text{S})$ -configuration to the low- $t_{\text{R}}$  isomer (G $\beta(\text{S})\text{G}$ ) and the  $\beta(\text{R})$ -configuration to the high- $t_{\text{R}}$  enantiomer (G $\beta(\text{R})\text{G}$ ). In parallel reactions (Fig. S3A),  $\text{C}\gamma$ -MTPA( $\text{R}$ ) esters were synthesized by acylating (with MTPACl( $\text{S}$ )) the  $\text{C}\gamma$ -OH positions of enantiopure G $\beta(\text{S})\text{G}$  and G $\beta(\text{R})\text{G}$ , yielding two diastereometric derivatives, G $\beta(\text{S})\text{G}$ -MTPA( $\text{R}$ ) and G $\beta(\text{R})\text{G}$ -MTPA( $\text{R}$ ), and small quantities of an achiral  $\beta,\gamma$ -unsaturated alkene (G $\beta$ G-propenone) that appeared in each preparation. We then compared the aligned  $^1\text{H}$  NMR spectra of G $\beta(\text{S})\text{G}$ -MTPA( $\text{R}$ ) (Fig. S4A) and G $\beta(\text{R})\text{G}$ -MTPA( $\text{R}$ ) (Fig. S4B) and observed that splitting of the  $\gamma\text{H}_a$  and  $\gamma\text{H}_b$  proton spectral regions were unique to each diastereomer, as expected for an MTPA( $\text{R}$ )-acylated primary alcohol with an adjacent chiral carbon.<sup>14</sup> We found that the difference in chemical shifts between the  $\gamma\text{H}_a$  and  $\gamma\text{H}_b$  spectral regions (termed  $\Delta\delta_{ab}$  hereafter) was lesser for the G $\beta(\text{S})\text{G}$ -MTPA( $\text{R}$ ) diastereomer ( $\Delta\delta_{ab} = 0.08$  ppm, Fig. S4A) than for the G $\beta(\text{R})\text{G}$ -MTPA( $\text{R}$ ) ester ( $\Delta\delta_{ab} = 0.24$  ppm, Fig. S4B).

Based on the chromatogram alignment of  $\beta$ -etherase assays with substrate *racem*-S $\beta$ S (Fig. 5), we hypothesized that the low- $t_{\text{R}}$  S $\beta$ S isomer was  $\text{S}\beta(\text{R})\text{S}$  and that the high- $t_{\text{R}}$  S $\beta$ S enantiomer was  $\text{S}\beta(\text{S})\text{S}$ . To test this, we again synthesized two  $\text{C}\gamma$ -MTPA( $\text{R}$ ) esters (Fig. S3B) from enantiopure S $\beta$ S isomers. We then analyzed the  $^1\text{H}$  NMR spectra of the  $\text{C}\gamma$ -MTPA( $\text{R}$ ) ester derived from the low- $t_{\text{R}}$  S $\beta$ S isomer (Fig. S4C) and of the  $\text{C}\gamma$ -MTPA( $\text{R}$ ) ester derived from the high- $t_{\text{R}}$  S $\beta$ S enantiomer (Fig. S4D). We found that splitting of the  $\gamma\text{H}_a$  and  $\gamma\text{H}_b$  spectral regions was greater for the MTPA( $\text{R}$ ) ester of the low- $t_{\text{R}}$  S $\beta$ S isomer ( $\Delta\delta_{ab} = 0.32$  ppm, Fig. S4C) than for the MTPA( $\text{R}$ ) ester of the high- $t_{\text{R}}$  S $\beta$ S isomer ( $\Delta\delta_{ab} = 0.15$  ppm, Fig. S4D). Thus, based on the similarities between of the  $\gamma\text{H}_a$ - $\gamma\text{H}_b$  splitting patterns of G $\beta(\text{R})\text{G}$ -MTPA( $\text{R}$ ) (Fig. S4B) and the low- $t_{\text{R}}$  S $\beta$ S isomer-derived MTPA( $\text{R}$ ) ester (Fig. S4C), we have confirmed the hypothesis and assigned an absolute configuration to the low- $t_{\text{R}}$  S $\beta$ S enantiomer and have concluded its identity to be  $\text{S}\beta(\text{R})\text{S}$ . We have also assigned the high- $t_{\text{R}}$  S $\beta$ S enantiomer as  $\text{S}\beta(\text{S})\text{S}$  due to the similarity of its MTPA( $\text{R}$ ) ester's  $^1\text{H}$  NMR spectrum (Fig. S4D) with that of G $\beta(\text{S})\text{G}$ -MTPA( $\text{R}$ ) (Fig. S4A). Thus, as was the case with substrates G $\beta$ G (Fig. 2), G $\beta$ S (Fig. 3), and S $\beta$ G (Fig. 4), we conclude that each LigE/LigP homolog exhibits  $\beta(\text{R})$ -stereospecificity whereas each LigF homolog catalyzes  $\beta(\text{S})$ -ether cleavage of S $\beta$ S enantiomers (Fig. 5).

## SUPPORTING INFORMATION REFERENCES

1. Shevchuk, N. A.; Bryksin, A. V.; Nusinovich, Y. A.; Cabello, F. C.; Sutherland, M.; Ladisch, S., Construction of long DNA molecules using long PCR-based fusion of several fragments simultaneously. *Nucleic Acids Research* **2004**, *32*, (2).
2. Bryksin, A. V.; Matsumura, I., Overlap extension PCR cloning: a simple and reliable way to create recombinant plasmids. *Biotechniques* **2010**, *48*, (6), 463-465.
3. Horton, R. M.; Cai, Z.; Ho, S. N.; Pease, L. R., Gene splicing by overlap extension: Tailor-made genes using the polymerase chain reaction. *Biotechniques* **2013**, *54*, (3), 129-133.
4. Horton, R. M., *In vitro* recombination and mutagenesis of DNA : SOEing together tailor-made genes. *Methods in molecular biology (Clifton, N.J.)* **1993**, *15*, 251-61.
5. Gall, D. L.; Kim, H.; Lu, F.; Donohue, T. J.; Noguera, D. R.; Ralph, J., Stereochemical features of glutathione-dependent enzymes in the *Sphingobium* sp. strain SYK-6  $\beta$ -aryl etherase pathway. *J Biol Chem* **2014**, *289*, (12), 8656-67.
6. Adler, E.; Eriksoo, E., Guaiacylglycerol and its  $\beta$ -guaiacyl ether. *Acta chemica Scandinavica* **1955**, *9*, 341-342.
7. Landucci, L. L.; Geddes, S. A.; Kirk, T. K., Synthesis of C-14-labeled 3-methoxy-4-hydroxy- $\alpha$ -(2-methoxyphenoxy)- $\beta$ -hydroxypropiophenone, a lignin model-compound. *Holzforschung* **1981**, *35*, (2), 67-70.
8. Gottlieb, H. E.; Kotlyar, V.; Nudelman, A., NMR chemical shifts of common laboratory solvents as trace impurities. *Journal of Organic Chemistry* **1997**, *62*, (21), 7512-7515.
9. Fulmer, G. R.; Miller, A. J. M.; Sherden, N. H.; Gottlieb, H. E.; Nudelman, A.; Stoltz, B. M.; Bercaw, J. E.; Goldberg, K. I., NMR chemical shifts of trace impurities: Common laboratory solvents, organics, and gases in deuterated solvents relevant to the organometallic chemist. *Organometallics* **2010**, *29*, (9), 2176-2179.

10. Dale, J. A.; Mosher, H. S., Nuclear magnetic-resonance enantiomer reagents - configurational correlations via nuclear magnetic resonance chemical shifts of diastereomeric mandelate, *o*-methylmandelate, and  $\alpha$ -methoxy- $\alpha$ -trifluoromethylphenylacetate (MTPA) esters. *Journal of the American Chemical Society* **1973**, *95*, (2), 512-519.
11. Hishiyama, S.; Otsuka, Y.; Nakamura, M.; Ohara, S.; Kajita, S.; Masai, E.; Katayama, Y., Convenient synthesis of chiral lignin model compounds via optical resolution: four stereoisomers of guaiacylglycerol- $\beta$ -guaiacyl ether and both enantiomers of 3-hydroxy-1-(4-hydroxy-3-methoxyphenyl)-2-(2-methoxy-phenoxy)-propan-1-one (erone). *Tetrahedron Letters* **2012**, *53*, 842-845.
12. Tanamura, K.; Abe, T.; Kamimura, N.; Kasai, D.; Hishiyama, S.; Otsuka, Y.; Nakamura, M.; Kajita, S.; Katayama, Y.; Fukuda, M.; Masai, E., Characterization of the third glutathione S-transferase gene involved in enantioselective cleavage of the  $\beta$ -aryl ether by *Sphingobium* sp. Strain SYK-6. *Bioscience, biotechnology, and biochemistry* **2011**, *75*, (12), 2404-7.
13. Masai, E.; Ichimura, A.; Sato, Y.; Miyauchi, K.; Katayama, Y.; Fukuda, M., Roles of the enantioselective glutathione S-transferases in cleavage of  $\beta$ -aryl ether. *Journal of Bacteriology* **2003**, *185*, (6), 1768-1775.
14. Tsuda, M.; Toriyabe, Y.; Endo, T.; Kobayashi, J., Application of modified Mosher's method for primary alcohols with a methyl group at C2 position. *Chemical & pharmaceutical bulletin* **2003**, *51*, (4), 448-451.

## SUPPORTING INFORMATION FIGURES

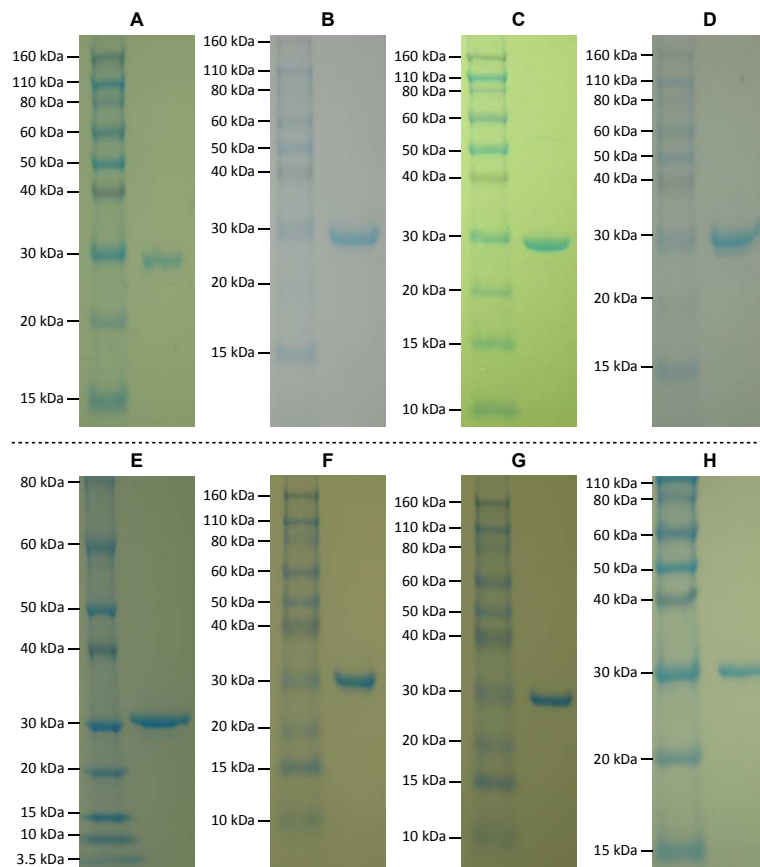

**Fig. S1.** Images of SDS-12% PAGE gels loaded with enzyme preparations (A), 28.6-kDa RpHypGST (B), 31.1-kDa NaLigE (C), 30.8-kDa NsLigE (D), 32.1-kDa SsLigE, (E) 31.0-kDa SsLigP, (F) 28.9-kDa NaLigF1, (G) 29.3-kDa NaLigF2, and (H) 30.0-kDa SsLigF.



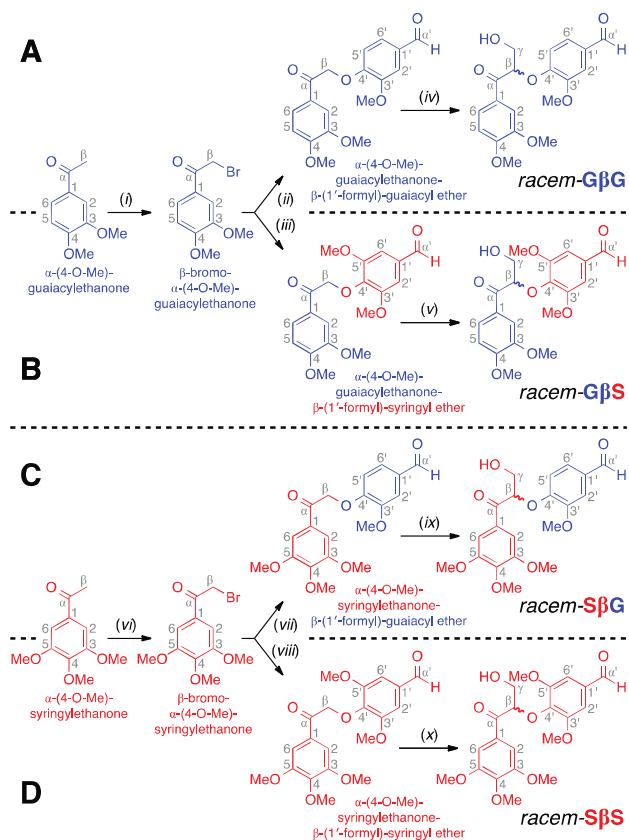

**Fig. S2.** Synthetic schemes for the preparation of  $\beta$ -etherase substrates (A) **G $\beta$ G**, (B) **G $\beta$ S**, (C) **S $\beta$ G**, and (D) **S $\beta$ S**. Reagents and conditions: (i) pyridinium tribromide, EtOAc, 30 min, 59%; (ii) vanillin, K<sub>2</sub>CO<sub>3</sub>, acetone, 1 h, 87%; (iii) syringaldehyde, K<sub>2</sub>CO<sub>3</sub>, acetone, 1 h, 84%; (iv) formaldehyde, K<sub>2</sub>CO<sub>3</sub>, 1,4-dioxane, 3 h, 79%; (v) formaldehyde, K<sub>2</sub>CO<sub>3</sub>, 1,4-dioxane, 3 h, 88%; (vi) pyridinium tribromide, EtOAc, 30 min, 66%; (vii) vanillin, K<sub>2</sub>CO<sub>3</sub>, acetone, 1 h, 92%; (viii) syringaldehyde, K<sub>2</sub>CO<sub>3</sub>, acetone, 1 h, 90%; (ix) formaldehyde, K<sub>2</sub>CO<sub>3</sub>, 1,4-dioxane, 3 h, 82%; (x) formaldehyde, K<sub>2</sub>CO<sub>3</sub>, 1,4-dioxane, 3 h, 78%.

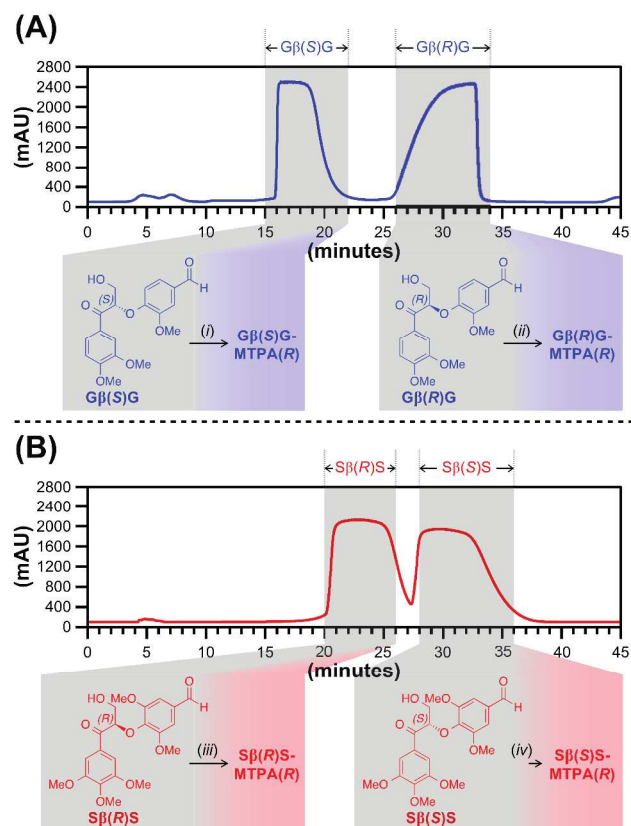

**Fig. S3.** Preparative chiral HPLC chromatographic separations (CHIRALPAK AY-H column,  $\lambda = 280$  nm) of (A) *racem*-GβG starting material, yielding Gβ(S)G (15-22 min) and Gβ(R)G (26-34 min) and (B) *racem*-SβS starting material, yielding Sβ(R)S (20-26 min) and Sβ(S)S (28-36 min). Reagents and conditions: (i-iv) diisopropylethylamine, dimethylaminopyridine, MTPACl(S), dichloromethane, 5 min, flash chromatography. Reaction yields: (i) 38%, (ii) 44%, (iii) 65%, (iv) 59%. Product MTPA(R) esters: (i) Gβ(S)G-MTPA(R); (ii) Gβ(R)G-MTPA(R); (iii) Sβ(R)S-MTPA(R); and (iv) Sβ(S)S-MTPA(R). Chemical structures of MTPA(R) esters are shown in Fig. S4.

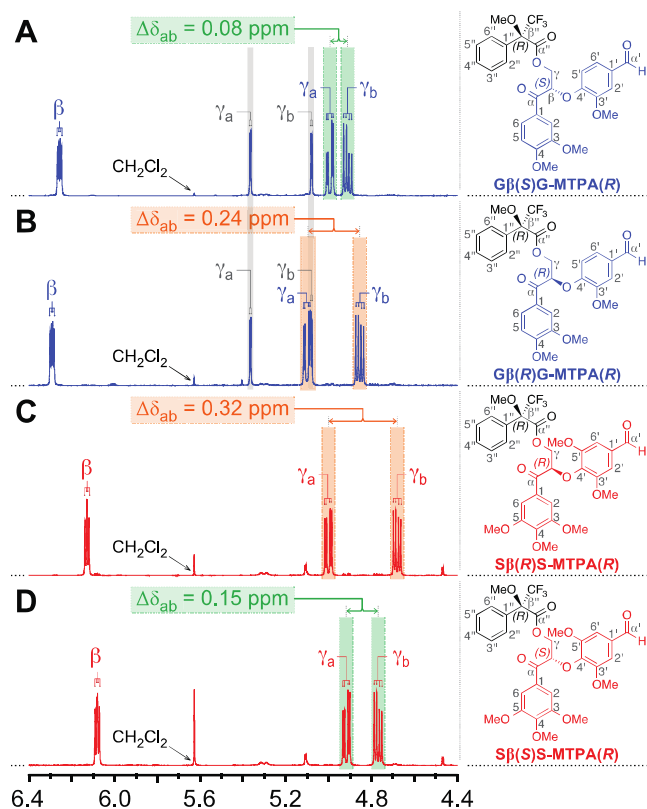

**Fig. S4.** Aligned  $^1\text{H}$  NMR spectra (4.40–6.40 ppm) of  $\beta$ -(1'-formyl)-guaiacyl- $\alpha$ -(4-O-Me)-guaiacylglyceryl  $\alpha$ (*R*)-methoxy-trifluoromethyl-phenyl-acetate (**G $\beta$ G-MTPA(*R*)** esters; shown in **blue**) and  $\beta$ -(1'-formyl)-syringyl- $\alpha$ -(4-O-Me)-syringylglyceryl  $\alpha$ (*R*)-methoxy-trifluoromethyl-phenyl-acetate (**S $\beta$ S-MTPA(*R*)** esters; shown in **red**). Proton assignment labels correspond with the carbon to which the proton is bound. Alphabetical subscripts differentiate two non-identical geminal protons.  $\gamma\text{H}_a$  and  $\gamma\text{H}_b$  proton spectral regions are highlighted for  $\beta$ (*R*)-configured (**orange**),  $\beta$ (*S*)-configured (**green**), and achiral G $\beta$ G-propenone (**grey**). (A) **G $\beta$ (*S*)G-MTPA(*R*)**, (B) **G $\beta$ (*R*)G-MTPA(*R*)**, (C) **S $\beta$ (*R*)S-MTPA(*R*)**, and (D) **S $\beta$ (*S*)S-MTPA(*R*)**.

## SUPPORTING INFORMATION - <sup>1</sup>H AND <sup>13</sup>C NMR SPECTRA OF MODEL COMPOUNDS AND REACTION PRODUCTS

| COMPOUND:                                                                                             | Spectra: Page:         |
|-------------------------------------------------------------------------------------------------------|------------------------|
| • $\beta(S)$ -(1'-formyl)-guaiacyl- $\alpha$ -(4-O-methyl)-guaiacylglyceryl                           | <sup>1</sup> H S - 21  |
| • $\alpha''(R)$ -methoxyl-trifluoromethyl-phenyl acetate, G $\beta(S)$ G-MTPA( <i>R</i> ) [synthetic] | <sup>13</sup> C S - 22 |
| • $\beta(R)$ -(1'-formyl)-guaiacyl- $\alpha$ -(4-O-methyl)-guaiacylglyceryl                           | <sup>1</sup> H S - 23  |
| • $\alpha''(R)$ -methoxyl-trifluoromethyl-phenyl acetate, G $\beta(R)$ G-MTPA( <i>R</i> ) [synthetic] | <sup>13</sup> C S - 24 |
| • $\alpha$ -(4-O-methyl)-guaiacyl- $\beta,\gamma$ -propenone- $\beta$ -(1'-formyl)-guaiacyl ether,    | <sup>1</sup> H S - 25  |
| • G $\beta$ G-propenone [synthetic]                                                                   | <sup>13</sup> C S - 26 |
| • $\beta(R)$ -(1'-formyl)-syringyl- $\alpha$ -(4-O-methyl)-syringylglyceryl                           | <sup>1</sup> H S - 27  |
| • $\alpha''(R)$ -methoxyl-trifluoromethyl-phenyl acetate, S $\beta(R)$ S-MTPA( <i>R</i> ) [synthetic] | <sup>13</sup> C S - 28 |
| • $\beta(S)$ -(1'-formyl)-syringyl- $\alpha$ -(4-O-methyl)-syringylglyceryl                           | <sup>1</sup> H S - 29  |
| • $\alpha''(R)$ -methoxyl-trifluoromethyl-phenyl acetate, S $\beta(S)$ S-MTPA( <i>R</i> ) [synthetic] | <sup>13</sup> C S - 30 |



**$\beta(S)$ -(1'-formyl)-guaiacyl- $\alpha$ -(4-O-methyl)-guaiacylglyceryl  
 $\alpha''(R)$ -methoxy-trifluoromethyl-phenyl acetate, G $\beta(S)$ G-MTPA(R) [synthetic]**  
 $^{13}\text{C}$  NMR (176 MHz, acetone- $d_6$ )

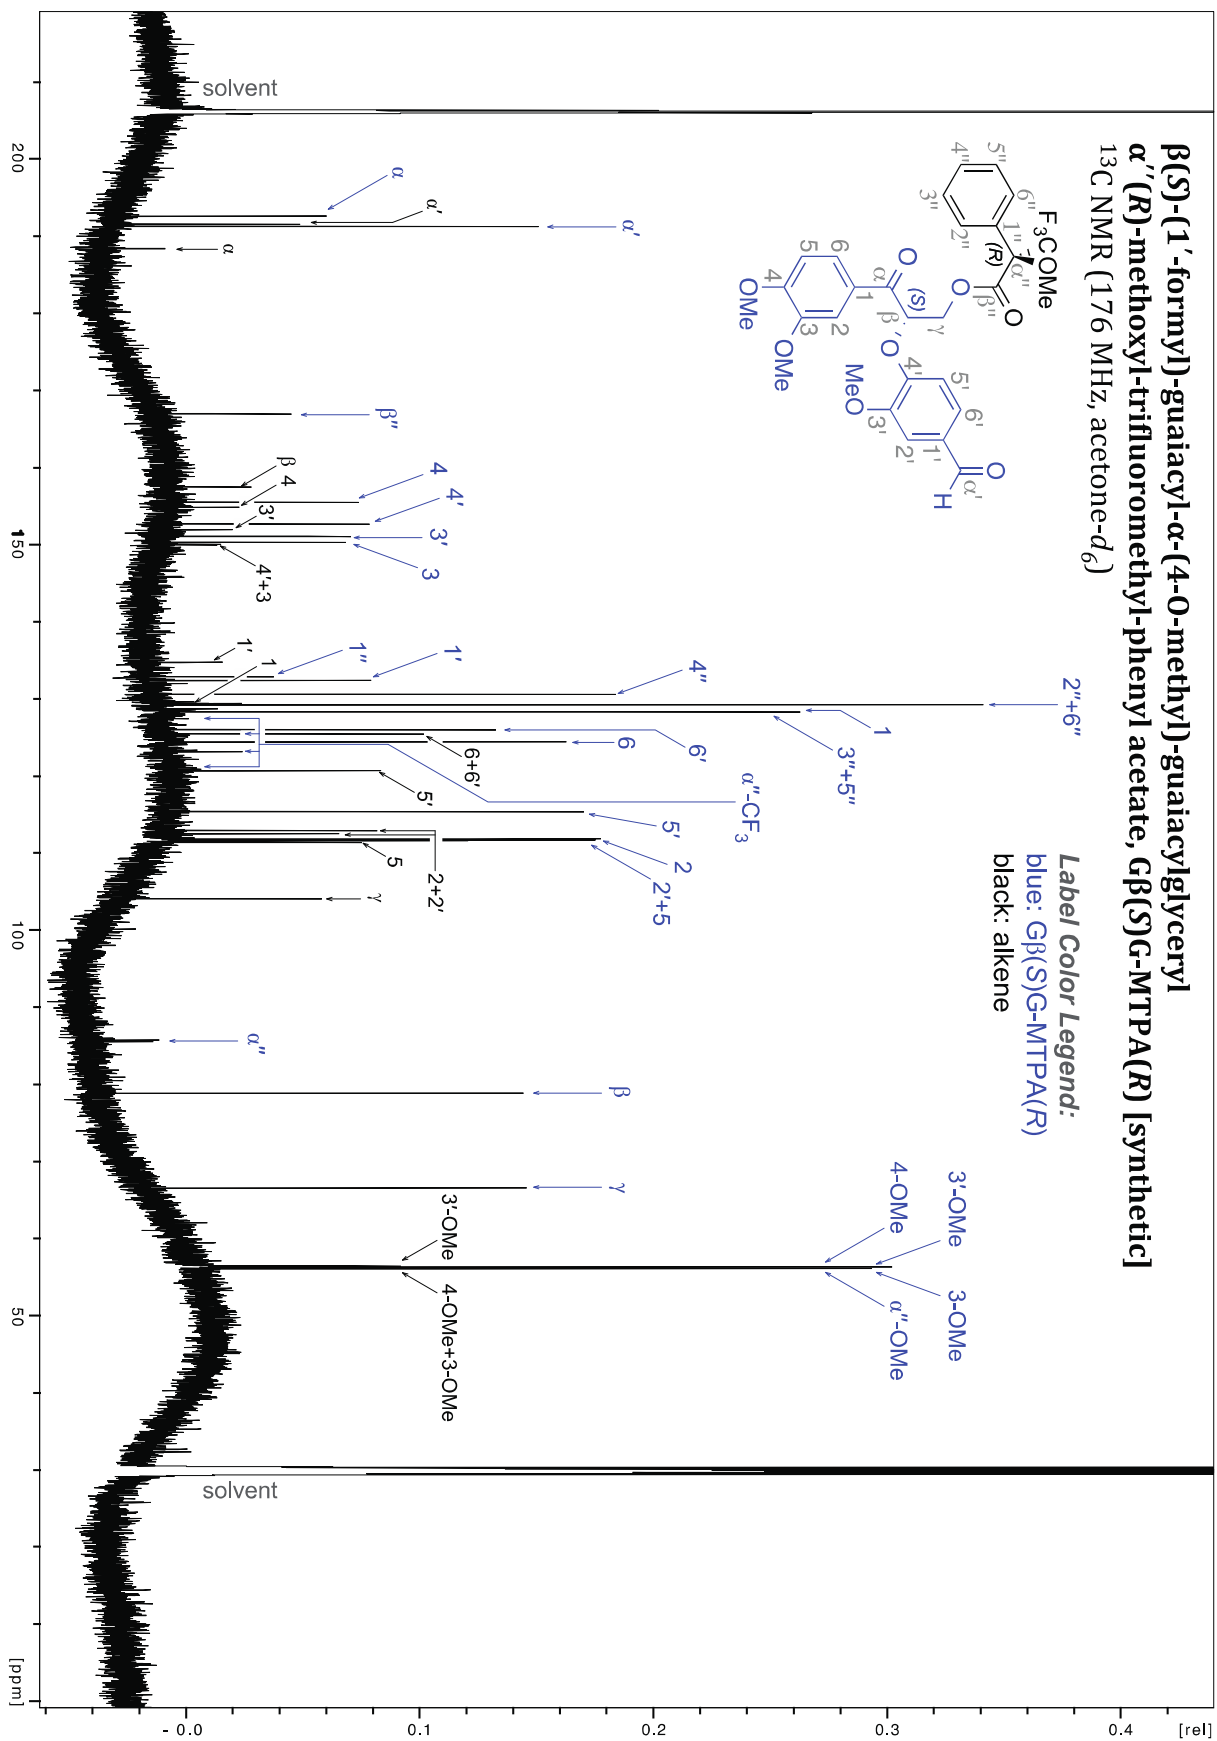

**$\beta(R)$ -(1'-formyl)-guaiacyl- $\alpha$ -(4-O-methyl)-guaiacylglyceryl  
 $\alpha''(R)$ -methoxyl-trifluoromethyl-phenyl acetate, G $\beta(R)$ G-MTPA(R) [synthetic]**  
 $^1\text{H NMR}$  (700 MHz, acetone- $d_6$ )

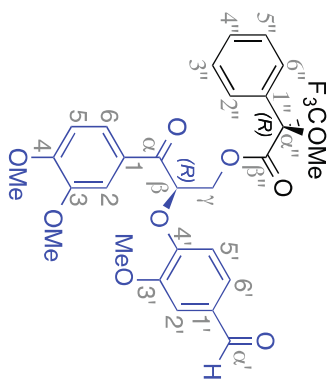

**Label Color Legend:**  
 blue: G $\beta(R)$ G-MTPA(R)  
 black: alkene

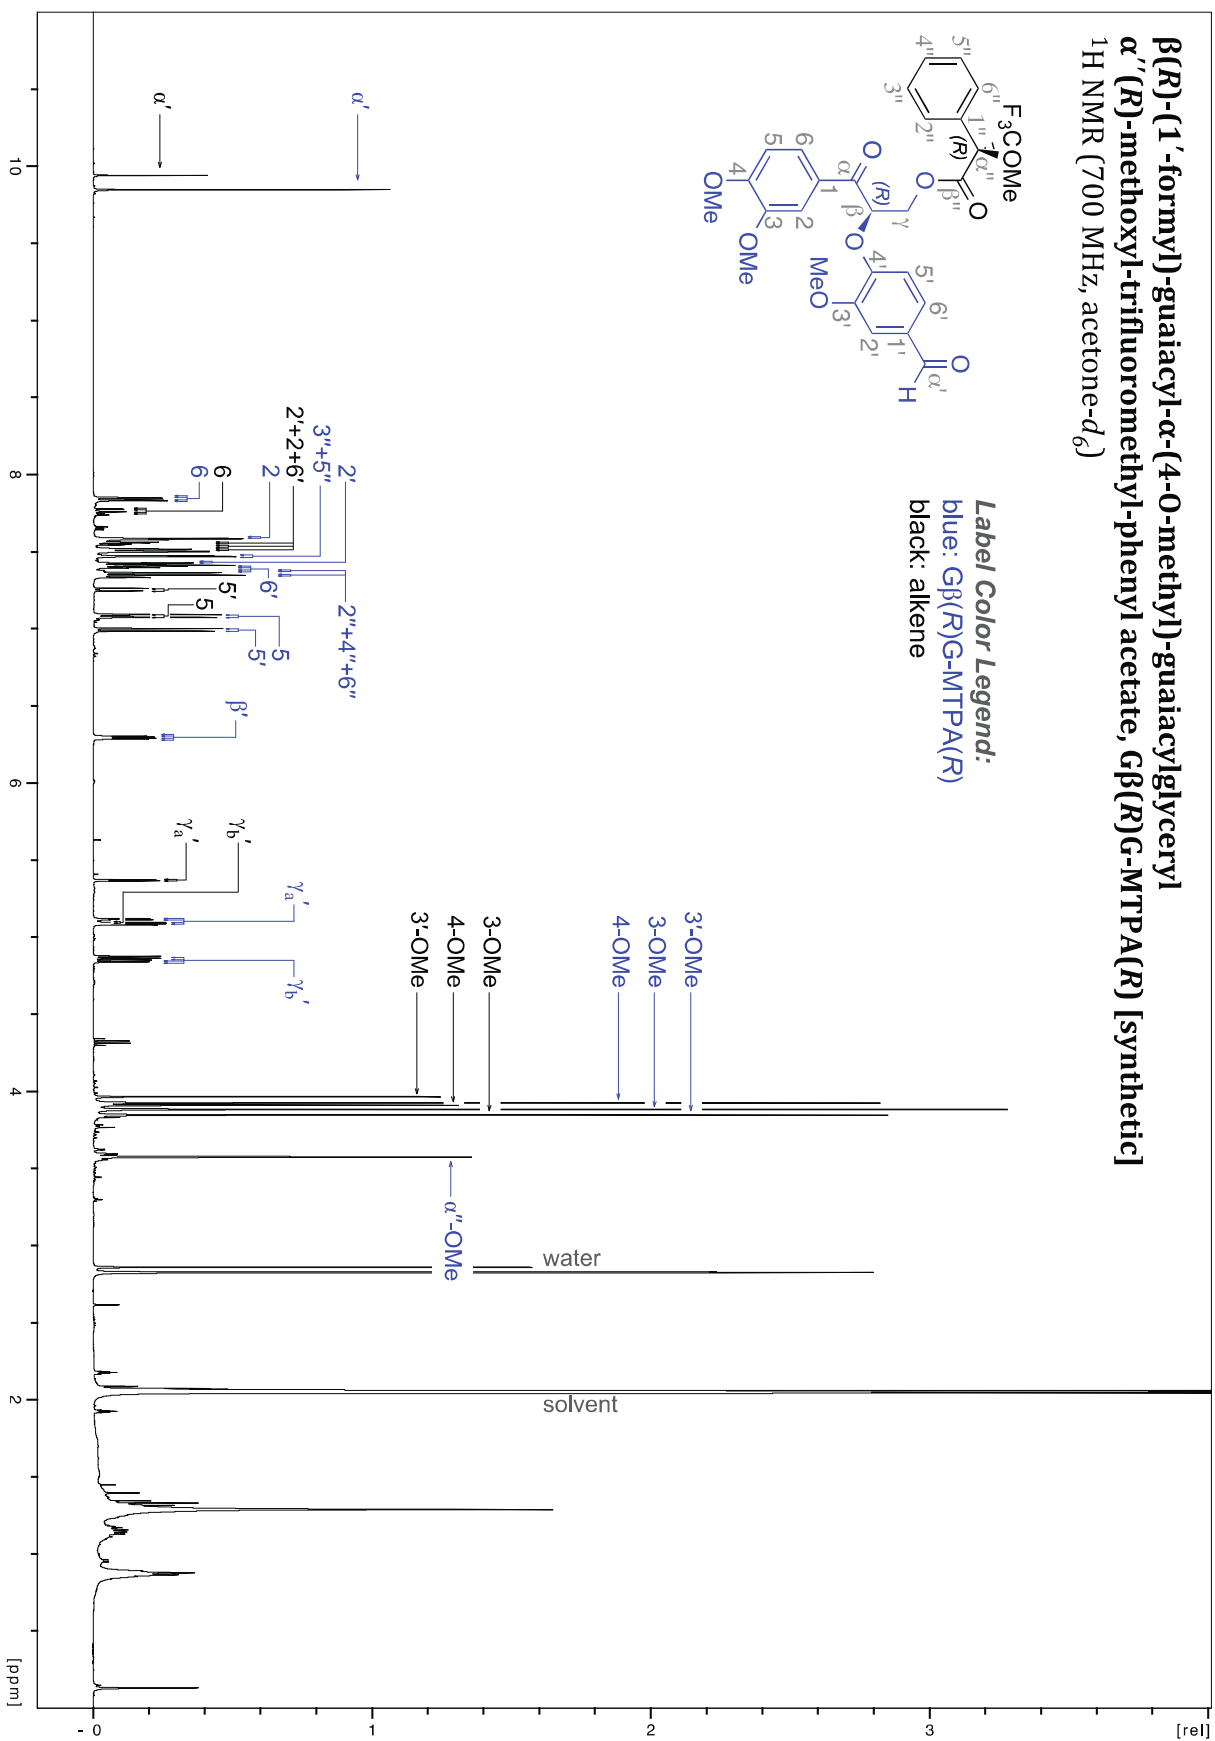

**$\beta(R)$ -(1'-formyl)-guaiacyl- $\alpha$ -(4-O-methyl)-guaiacyl]glyceryl  
 $\alpha''(R)$ -(*R*)-methoxy-trifluoromethyl-phenyl acetate, G $\beta(R)$ G-MTPA(*R*) [synthetic]  
<sup>13</sup>C NMR (176 MHz, acetone-*d*<sub>6</sub>)**

**Label Color Legend:**  
 blue: G $\beta(R)$ G-MTPA(*R*)  
 black: alkene

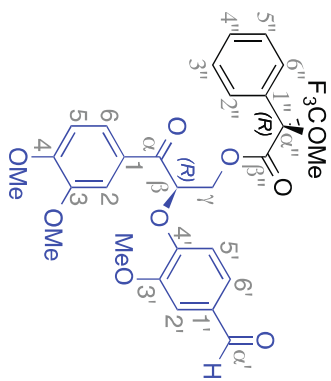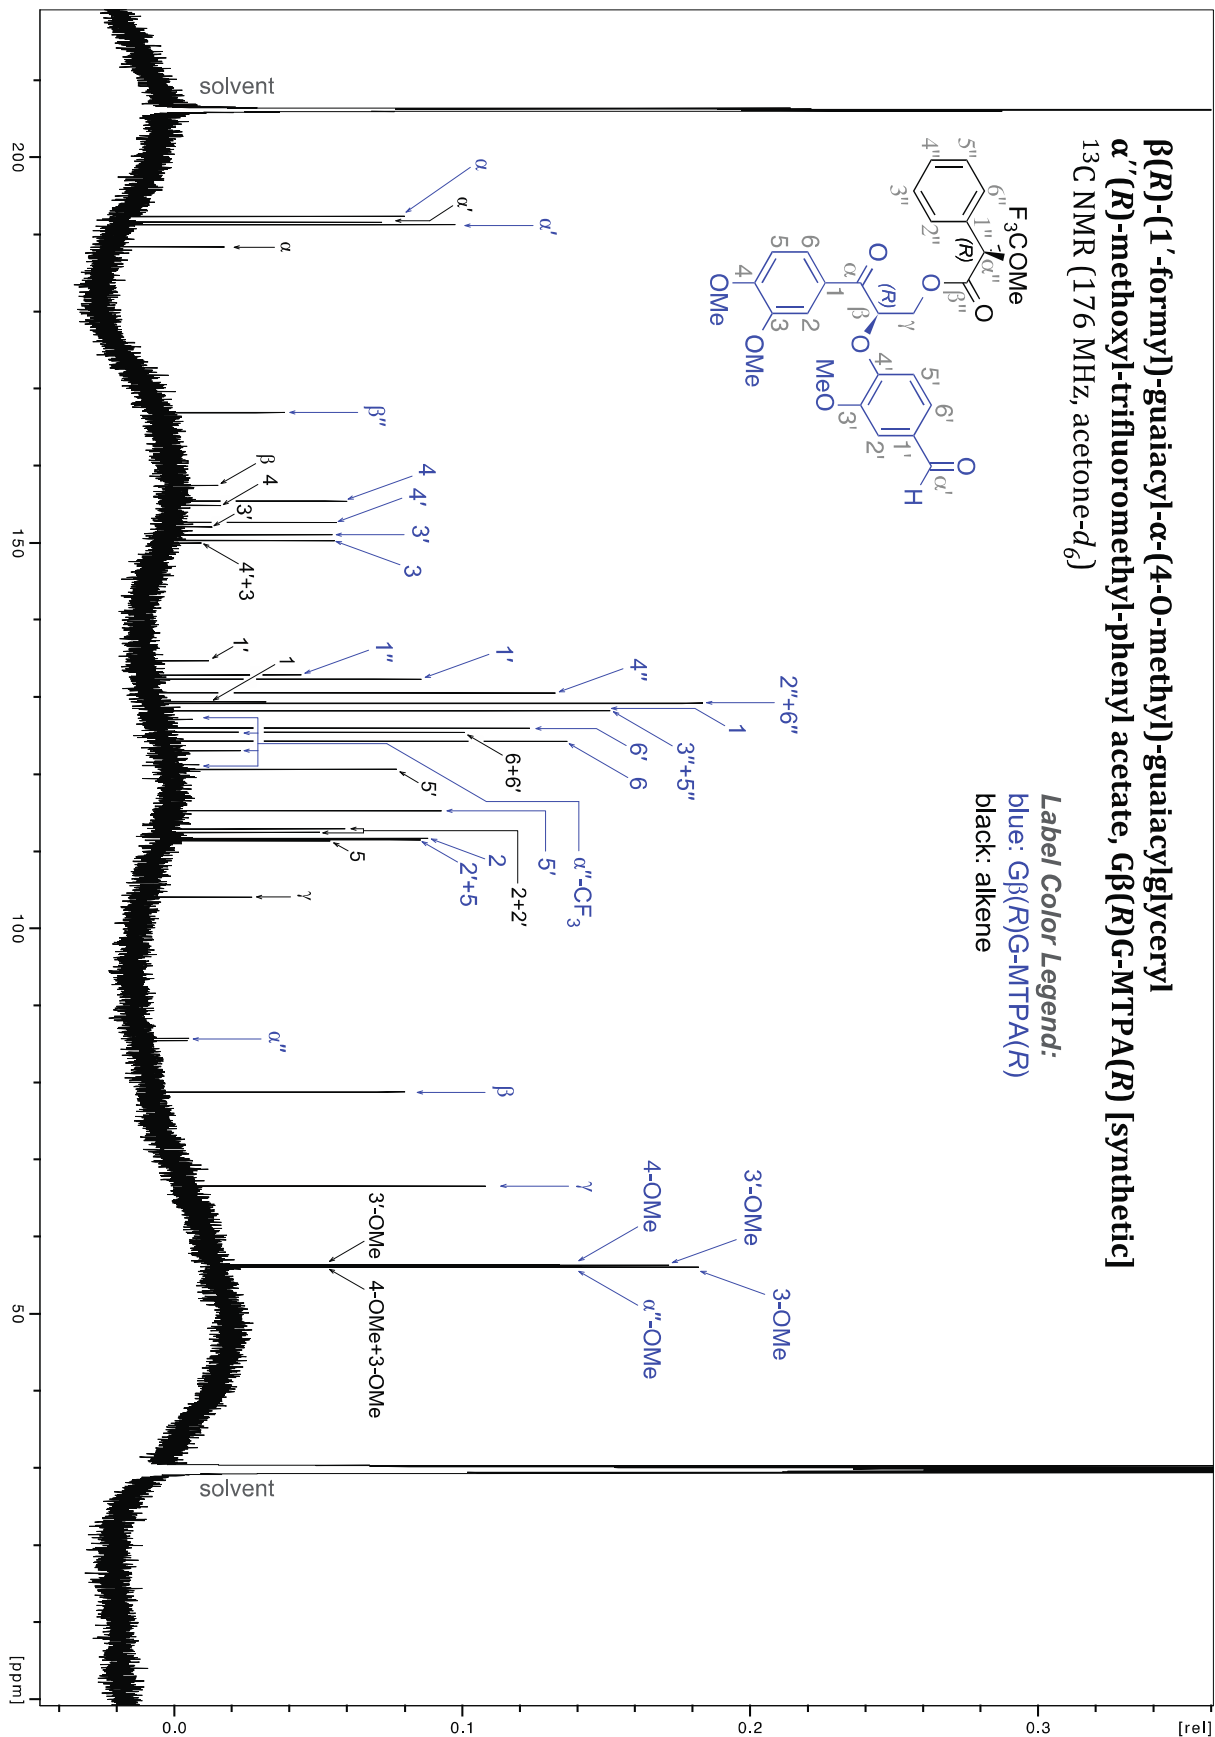



**$\alpha$ -(4-O-methyl)-guaiacyl- $\beta,\gamma$ -propenone- $\beta$ -(1'-formyl)-guaiacyl ether, GPG- $\beta$ -propenone, [synthetic]:**  
 $^1\text{H NMR}$  (700 MHz, acetone- $d_6$ )

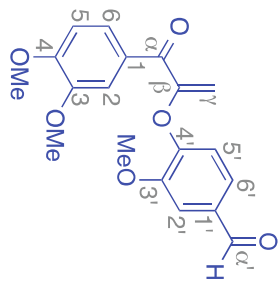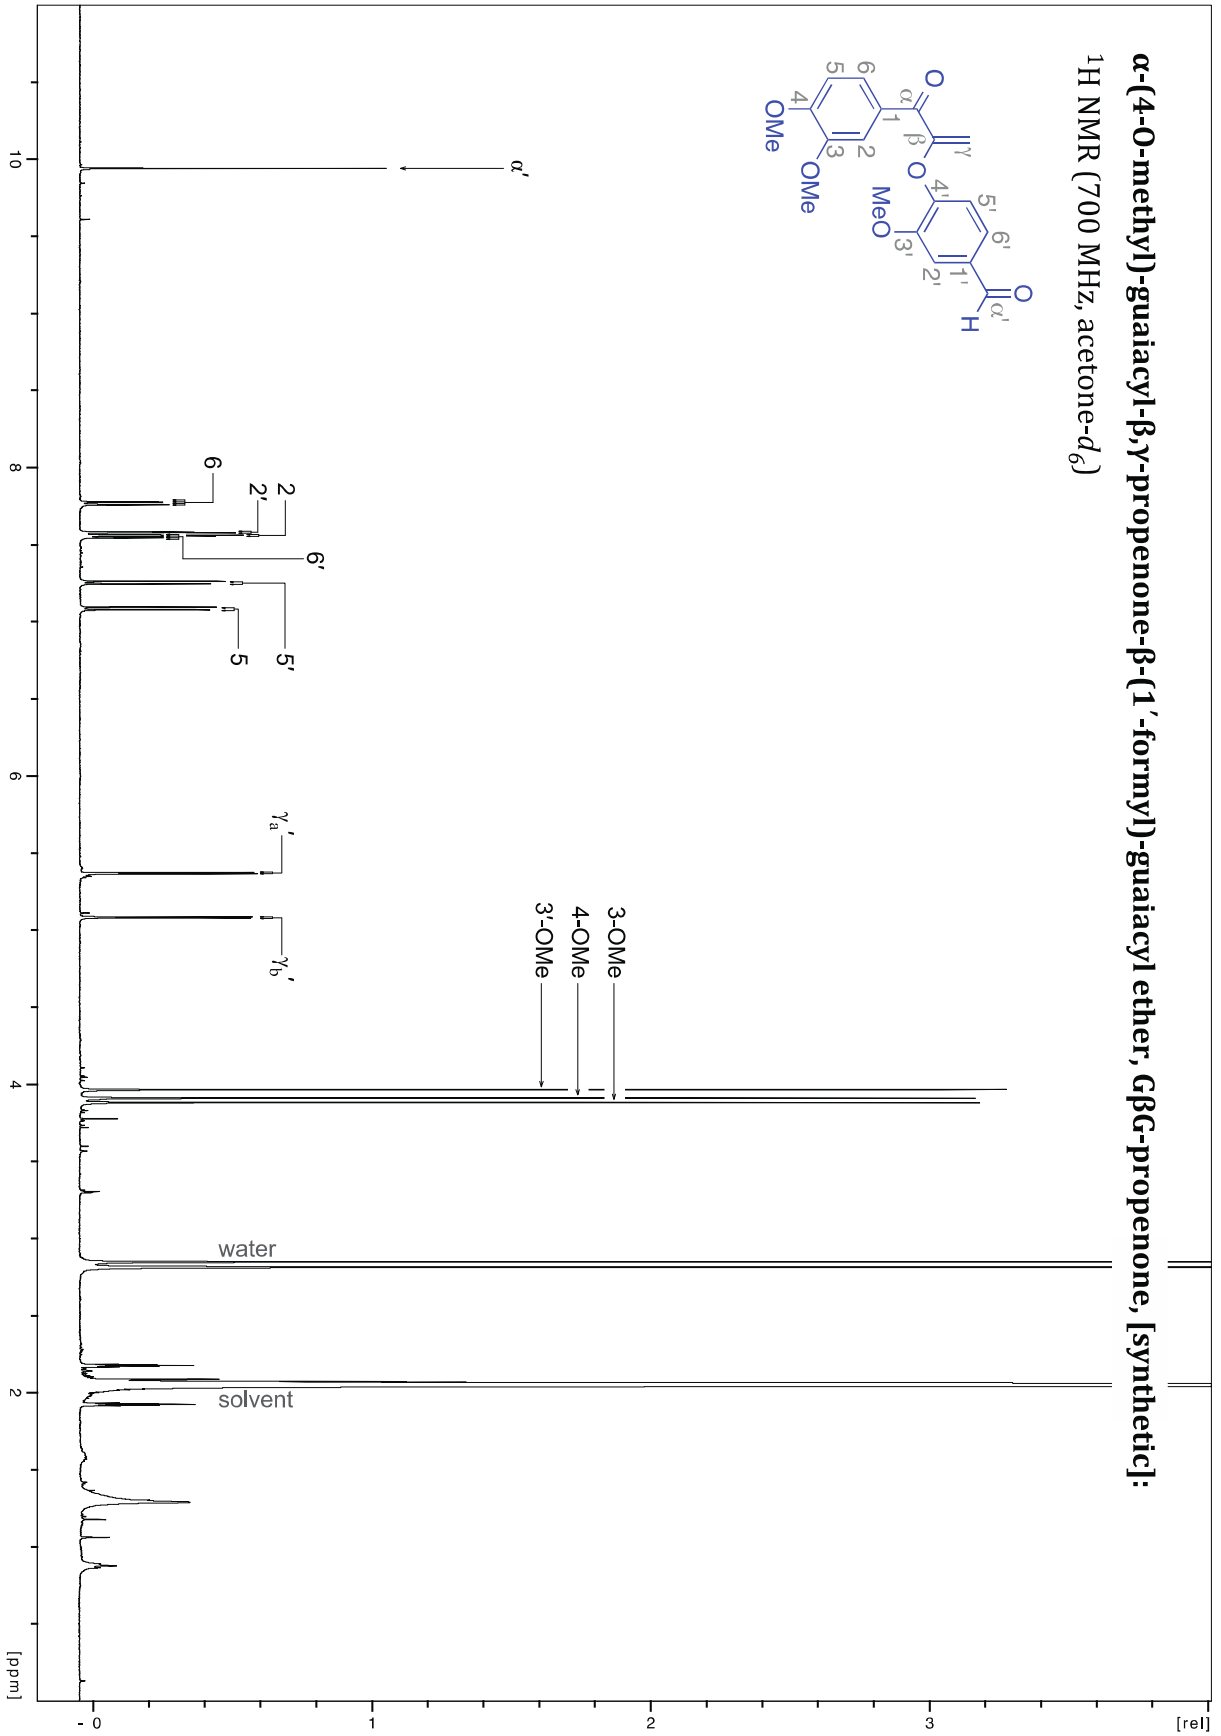

**$\alpha$ -(4-O-methyl)-guaiacyl- $\beta$ , $\gamma$ -propenone- $\beta$ -(1'-formyl)-guaiacyl ether,  $\beta$  $\beta$ G-propenone, [synthetic]:**  
 $^{13}\text{C}$  NMR (176 MHz, acetone- $d_6$ )

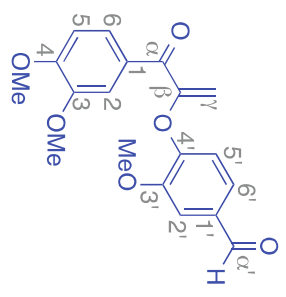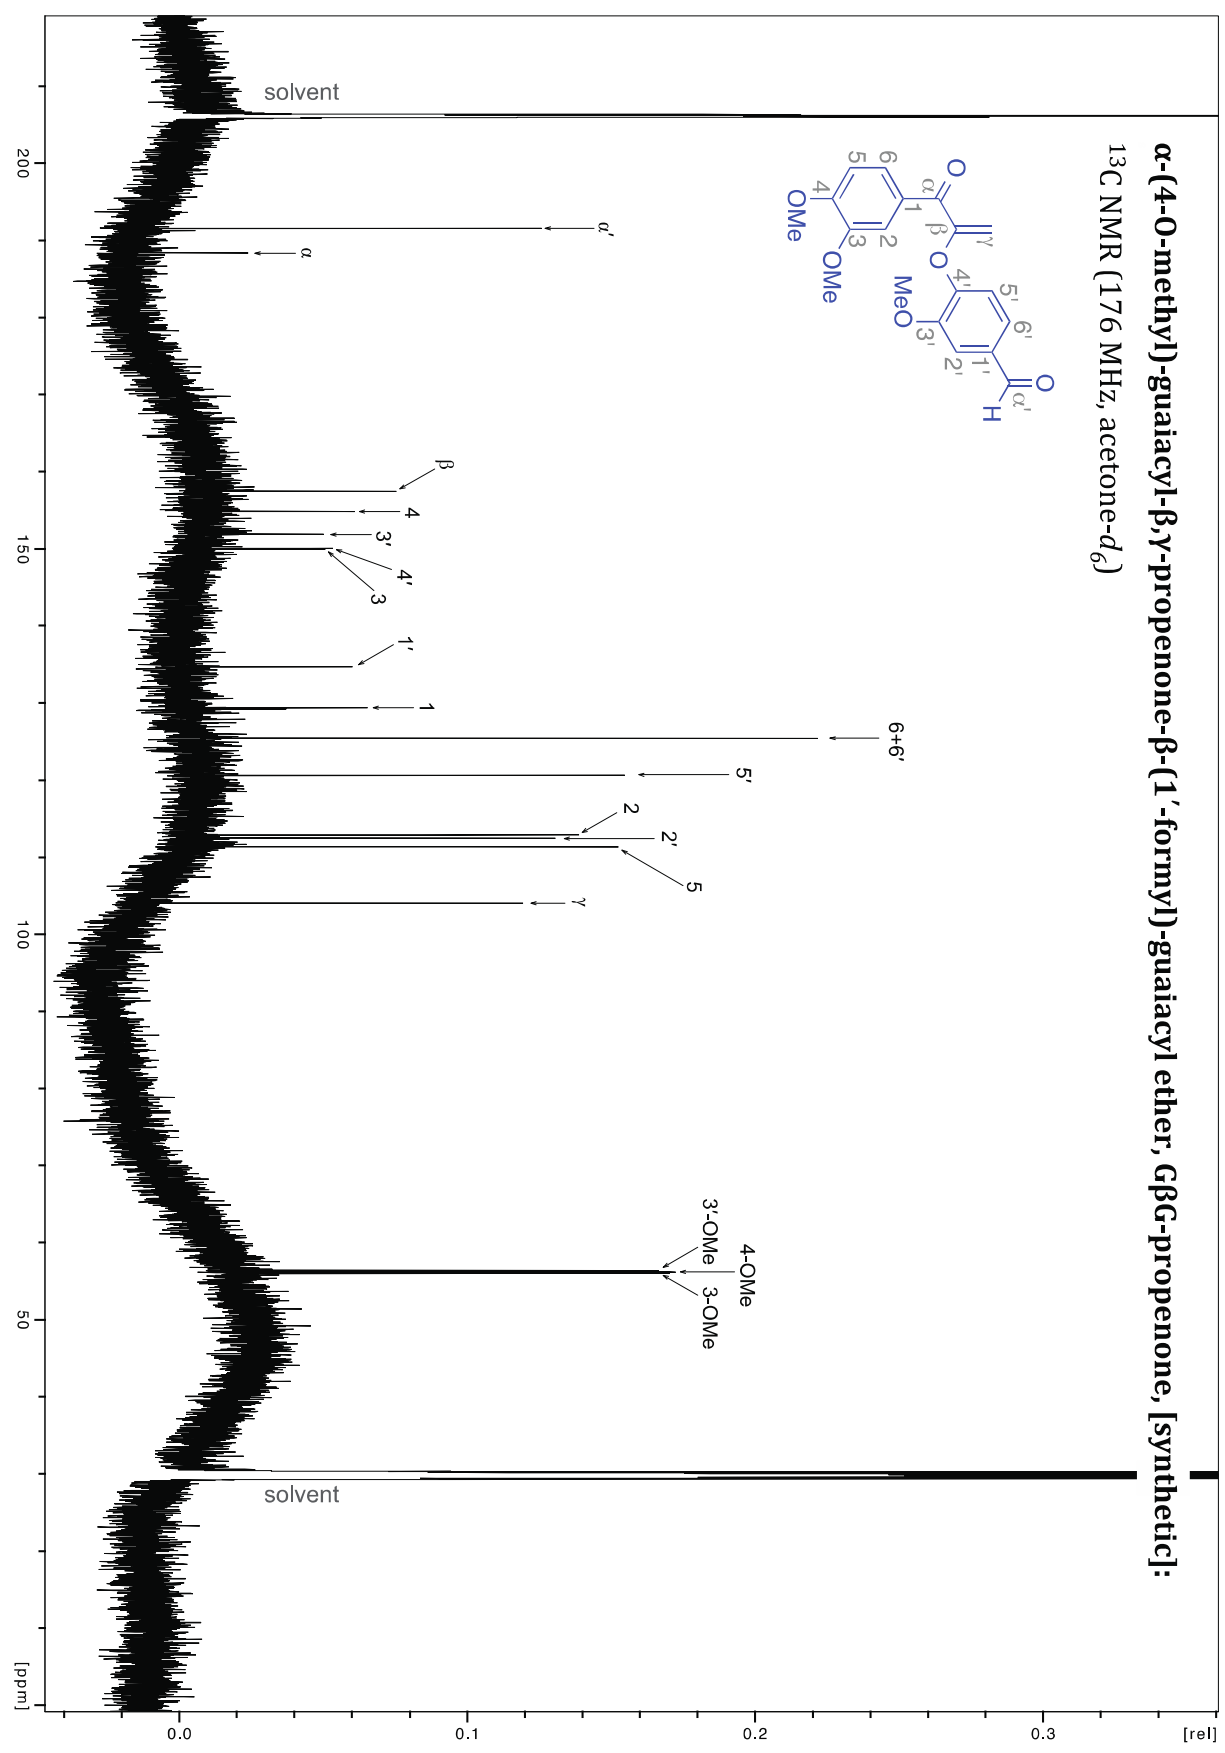

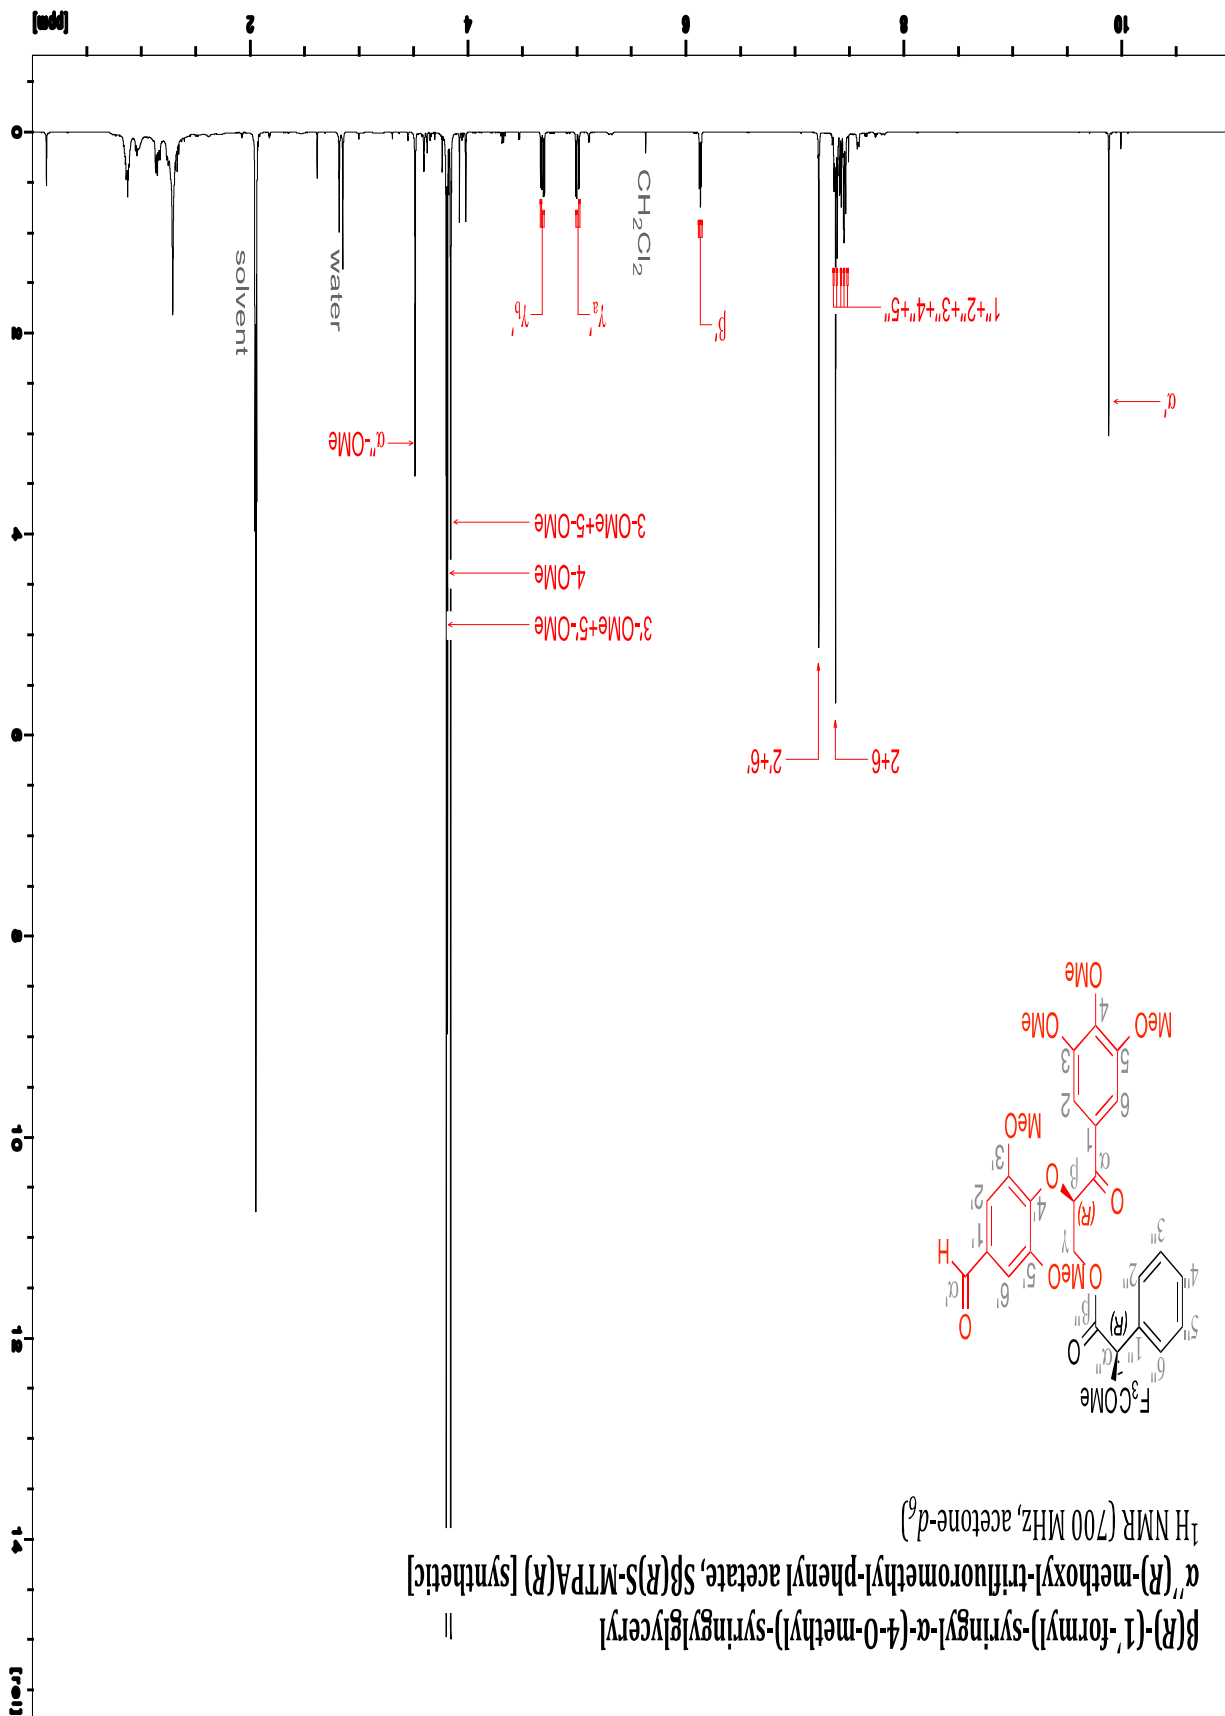

**$\beta$ (*R*)-(1'-formyl)-syringyl- $\alpha$ -(4-O-methyl)-syringylglyceryl  
 $\alpha''$ (*R*)-methoxy-trifluoromethyl-phenyl acetate, Sp(*R*)-S-MTPA(*R*) [synthetic]**  
 $^{13}\text{C}$  NMR (176 MHz, acetone- $d_6$ )

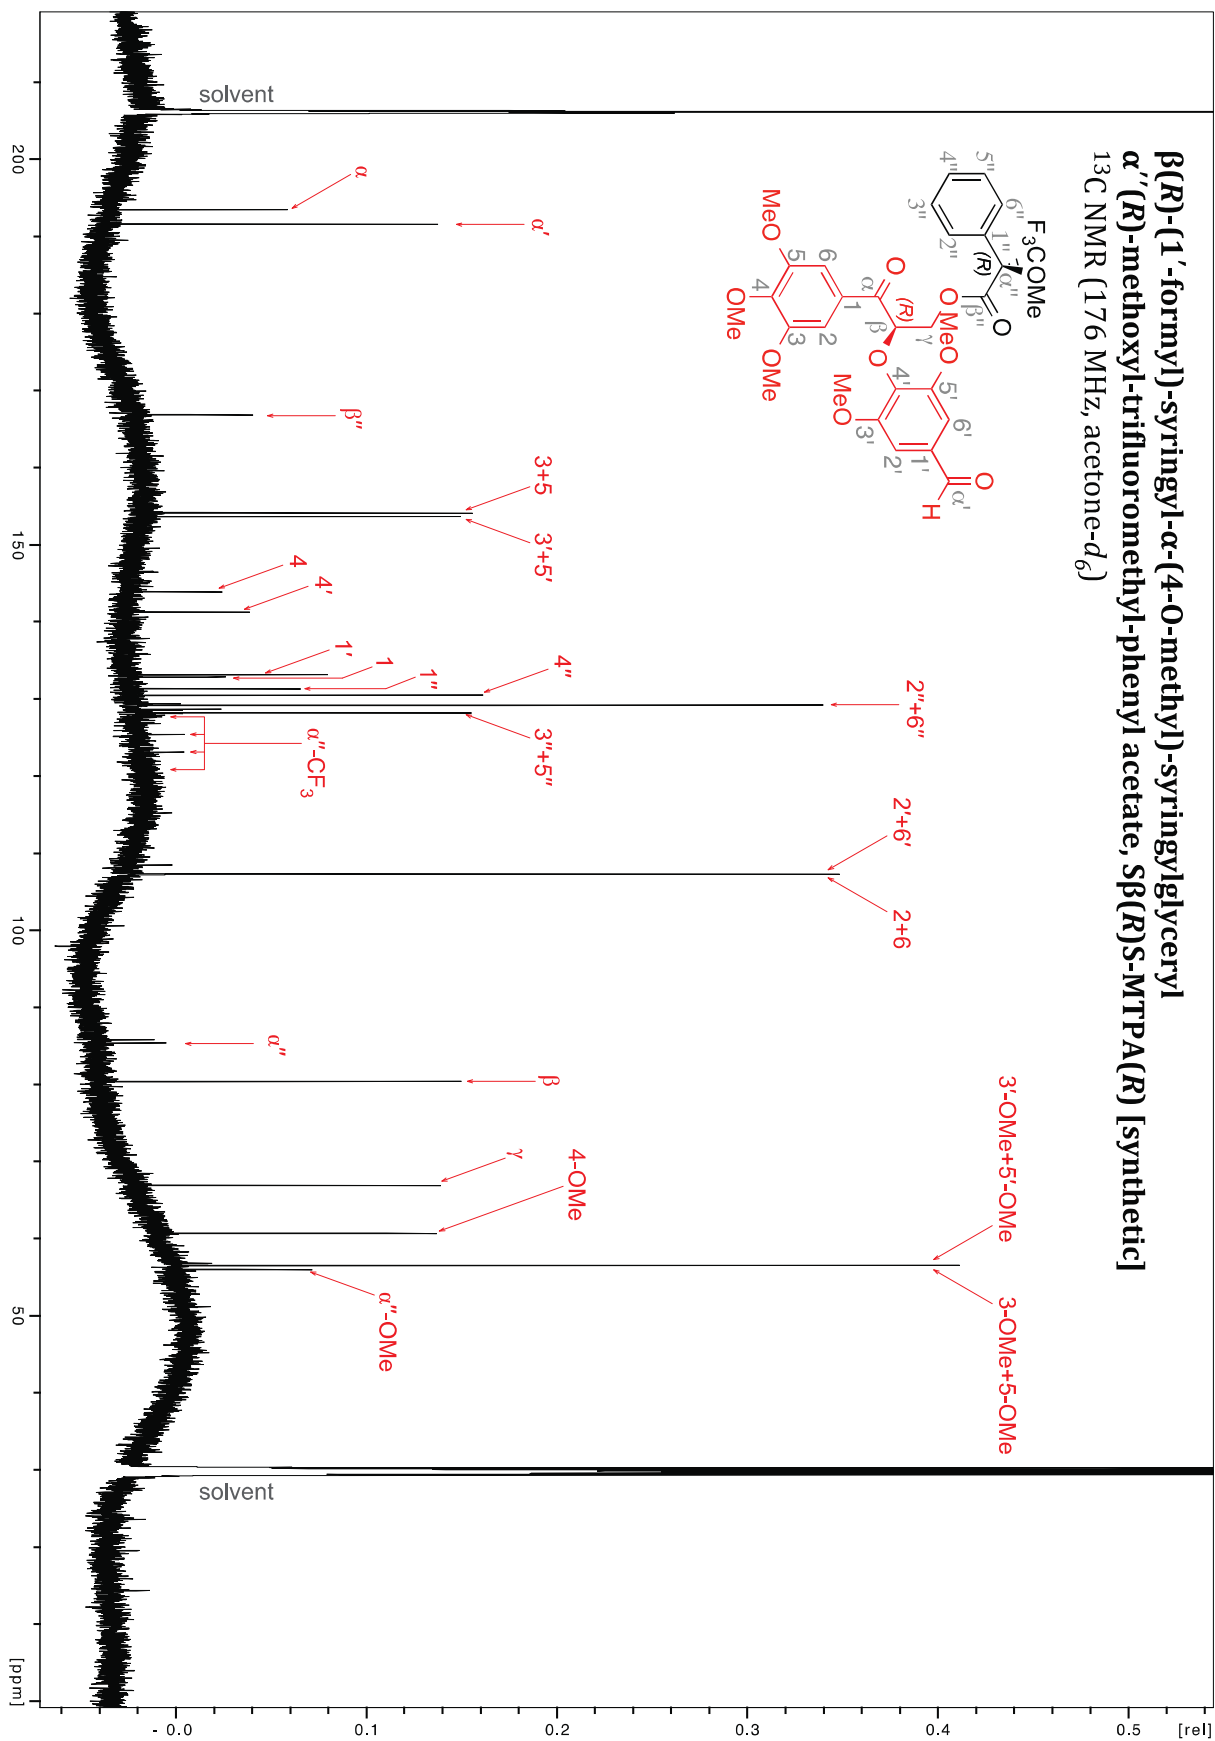

**$\beta(S)$ -(1'-formyl)-syringyl- $\alpha$ -(4-O-methyl)-syringylglyceryl  
 $\alpha''$ -(*R*)-methoxy-trifluoromethyl-phenyl acetate,  $S\beta(S)S$ -MTPA(*R*) [synthetic]  
 $^1\text{H}$  NMR (700 MHz, acetone- $d_6$ )**

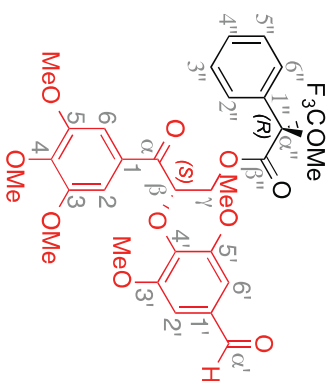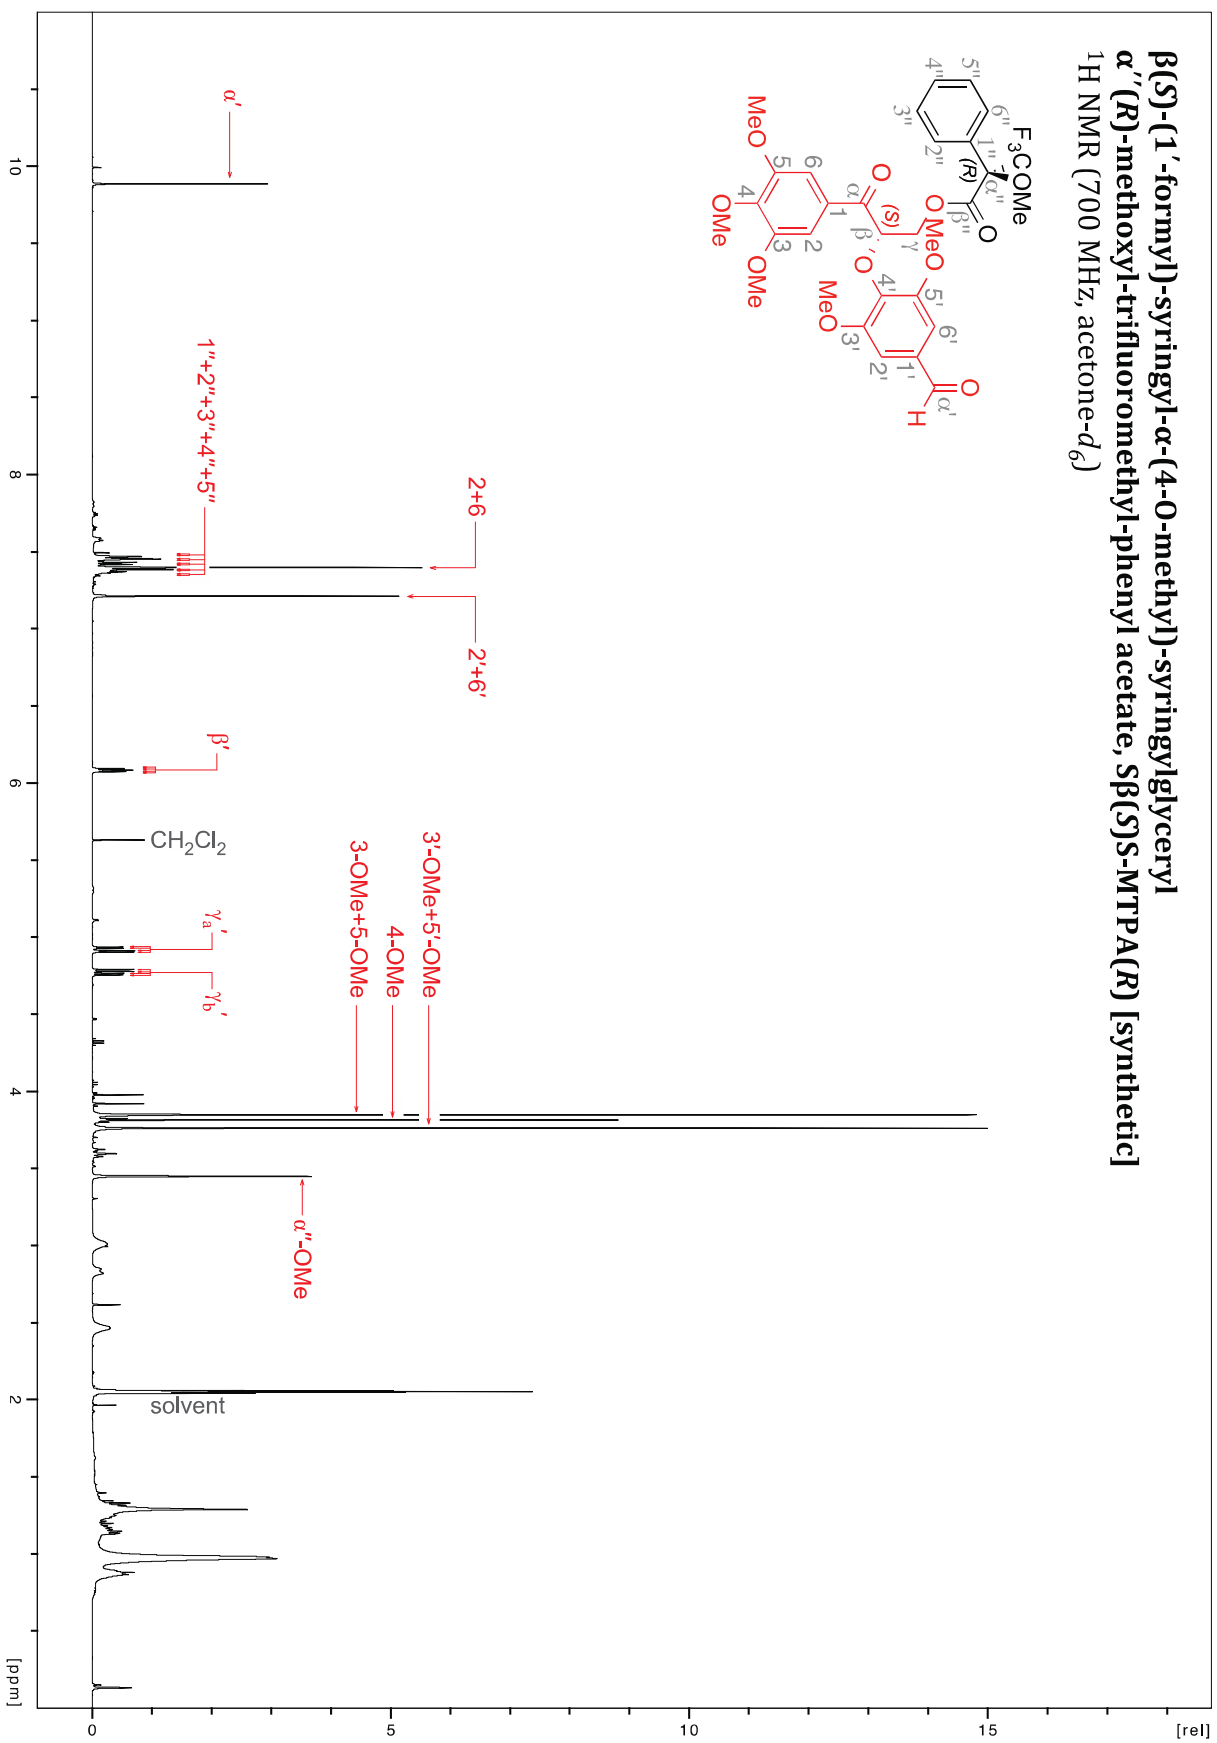

**$\beta(S)$ -(1'-formyl)-syringyl- $\alpha$ -(4-O-methyl)-syringylglyceryl  
 $\alpha''(R)$ -methoxy-trifluoromethyl-phenyl acetate,  $S\beta(S)S$ -MTPA(*R*) [synthetic]  
 $^{13}\text{C}$  NMR (176 MHz, acetone- $d_6$ )**

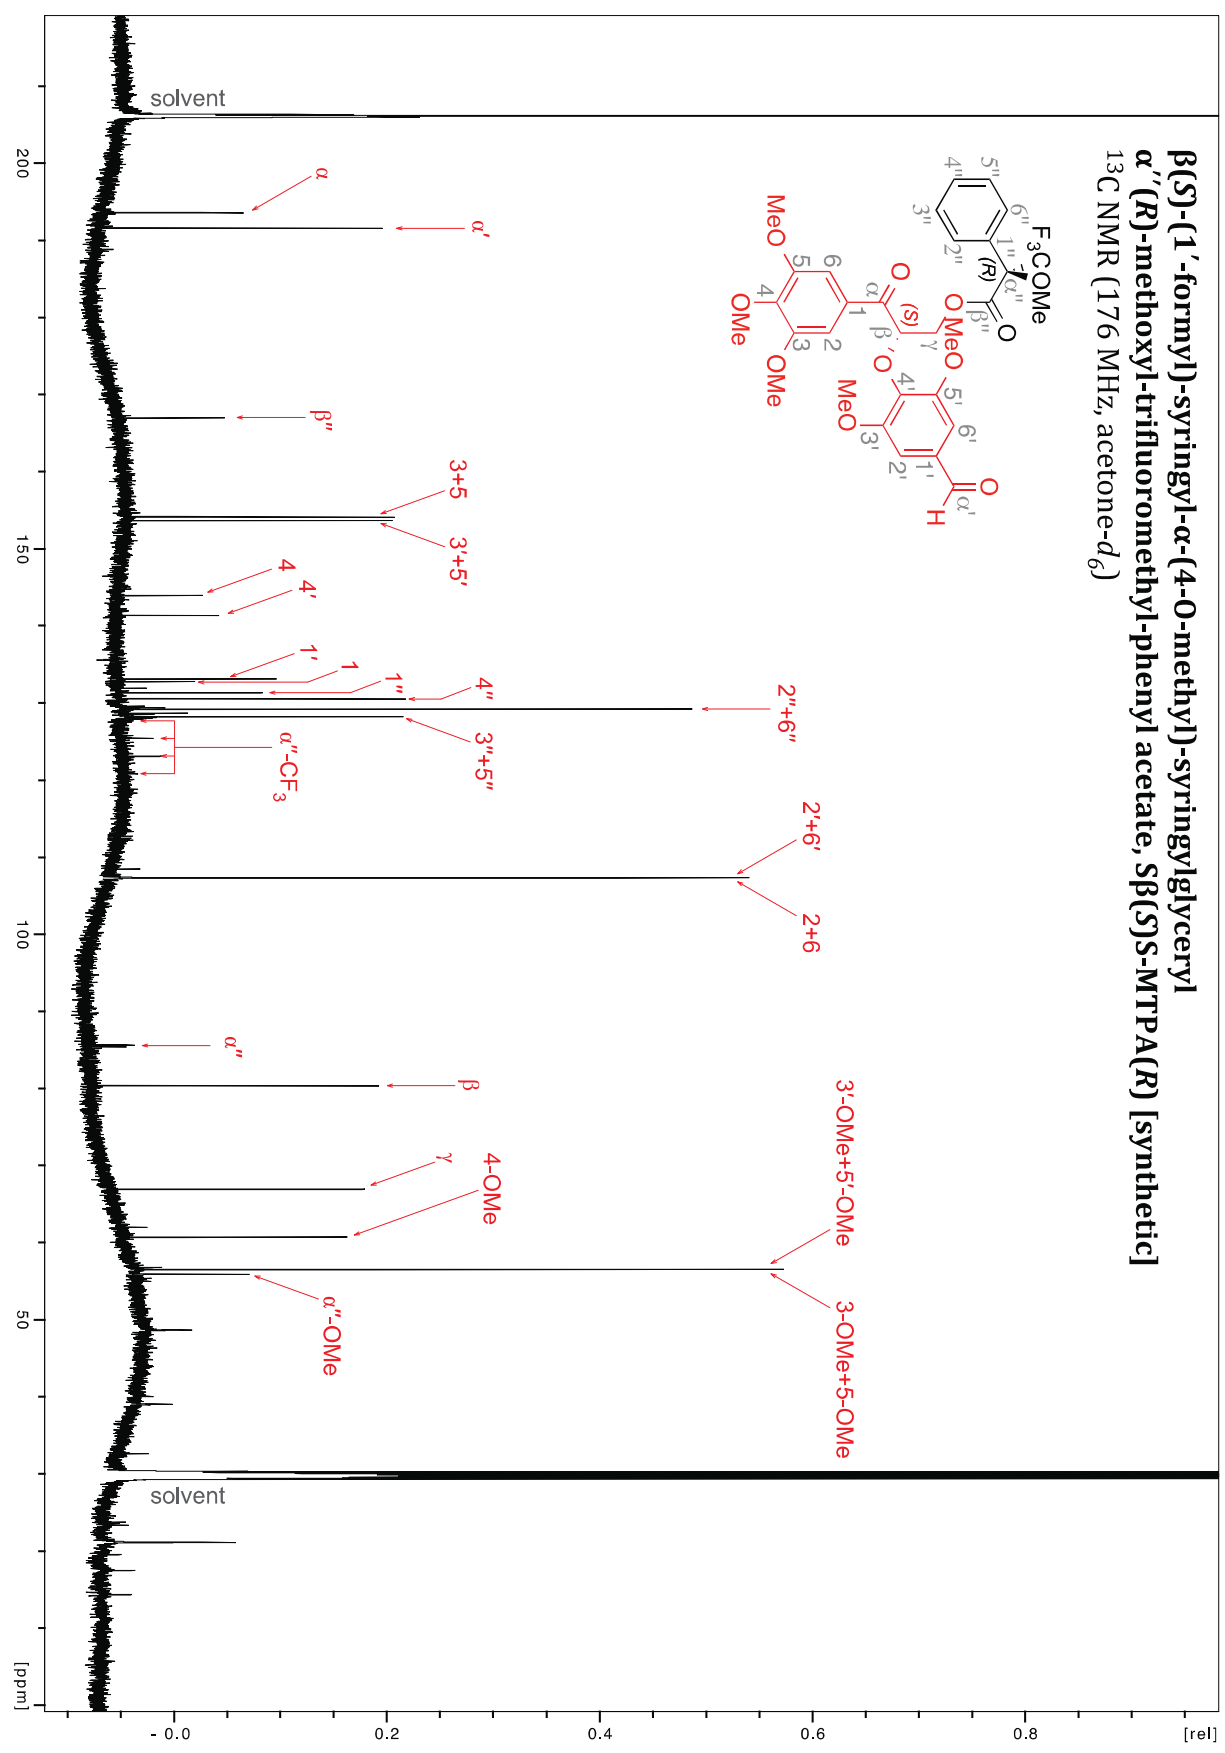

Supplement: es503886d_si_001.pdf [file es503886d_si_001.pdf]
